# Analysing biodiversity observation data collected in continuous time: Should we use discrete- or continuous-time occupancy models?

Léa Pautrel<sup>1,2,\*</sup>, Sylvain Moulherat<sup>1</sup>, Olivier Gimenez<sup>2,\*\*</sup>, and Marie-Pierre Etienne<sup>3,\*\*</sup>

<sup>1</sup>OïkoLab, TerrOïko, 2 Place Dom Devic, 81540 Sorèze, France

<sup>2</sup>CEFE, University of Montpellier, CNRS, EPHE, IRD, 1919 route de Mende, 34090 Montpellier, France

<sup>3</sup>IRMAR, Rennes University, Institut Agro Rennes Angers, 65 route de Saint Briec, 35042 Rennes,  
France

\* Corresponding author: [lea.pautrel@terroiko.fr](mailto:lea.pautrel@terroiko.fr)

\*\* Co-senior authors

## Abstract

1. Biodiversity monitoring is undergoing a revolution, with fauna observations data being increasingly gathered continuously over extended periods, through sensors like camera traps and acoustic recorders, or via opportunistic observations. These data are often analysed with discrete-time ecological models, requiring the transformation of continuously collected data into arbitrarily chosen non-independent discrete time intervals. To overcome this issue, ecologists are increasingly turning to the existing continuous-time models in the literature. Closer to the real detection process, they are lesser known than discrete-time models, not always easily accessible, and can be more complex. Focusing on occupancy models, a type of species distribution models, we asked ourselves: Should we dedicate time and effort to learning and using these continuous-time models, or can we go on using discrete-time models?

2. We conducted a comparative simulation study using data generated within a continuous-time framework. We assessed the performance of five static occupancy models with varying detection processes: discrete detection/non-detection process, discrete count process, continuous-time Poisson process, and two types of modulated Poisson processes. Our goal was to assess their abilities to estimate occupancy probability with continuously collected data. We applied all models to empirical lynx data as an illustrative example.

3. In scenarios with easily detectable animals, we found that all models accurately estimated occupancy. All models reached their limits with highly elusive animals. Variation in discretisation intervals had minimal impact on the discrete models' capacity to estimate occupancy accurately.

4. Our study underscores that opting for continuous-time models with an increased number of parameters, aiming to get closer to the sensor detection process, may not offer substantial advantages over simpler models when the sole aim is to accurately estimate occupancy. Model choice can thus be driven by practical considerations such as data availability or implementation time. However, occupancy models can encompass goals beyond estimating occupancy probability. Continuous-time models, particularly those considering temporal variations in detection, can offer valuable insights into specific species behaviour and broader ecological inquiries. We hope that our findings offer valuable guidance for researchers and practitioners working with continuously collected data in wildlife monitoring and modelling.

**Keywords** Camera trap, Continuous-time model, Discrete-time model, Markov Modulated Poisson Process, Occupancy modelling, Poisson Process, Sensors, Wildlife monitoring

## 1 Introduction

2 The alarming decline of biodiversity has led to a scientific, ethical, and legal need to better understand its  
3 drivers in order to protect nature more effectively (IPBES, 2019). With the reinforcement of regulations and  
4 recommendations for achieving the objectives of no net loss of biodiversity, the need for wildlife monitoring is  
5 growing rapidly (UNECE, 2023). Concurrently, the development of increasingly sophisticated and accessible  
6 technologies is leading to a digital revolution. Sensors, such as camera traps or autonomous recording units,  
7 are now available to address current ecological challenges (Burton et al., 2015; Potamitis et al., 2014).

8 Sensors offer many advantages compared to traditional field observations by naturalists. They are  
9 non-invasive, often cost-effective, particularly adapted to observe some elusive or shy species, potentially in  
10 challenging terrain, and they can improve reproducibility and protocol standardisation (Steenweg et al., 2017;  
11 Zwerts et al., 2021). Sensors are therefore good candidates for setting up large-scale monitoring (Oliver et al.,  
12 2023) and collaborations such as Biodiversity Observation Networks (Gonzalez et al., 2023). Policies now  
13 emphasise the use of sensors, big data and artificial intelligence to improve knowledge and understanding of  
14 species and ecosystems, such as the International Union for Conservation of Nature (IUCN) Nature 2030  
15 programme (IUCN, 2021) or the Biodiversa+ European Biodiversity Partnership (Høye et al., 2022; Vihervaara  
16 et al., 2023).

17 We often use ecological models to analyse observation data for monitoring purposes. These models typically  
18 assess the presence (Guillera-Arroita, 2017) or abundance (Gilbert et al., 2021) of a species, often while  
19 considering the relation with environmental factors. They can be used for a particular species or within a  
20 multi-species framework (Pollock et al., 2014). These models produce actionable knowledge about species,  
21 influencing our actions and our approach to biodiversity conservation. For example, the area of occupancy,  
22 *i.e.* the spatial distribution where a species is present, is one of the criterion used by the IUCN to establish the  
23 Red list of Ecosystems (Rodríguez et al., 2015).

24 In this paper, we focus on occupancy models, a category of ecological models aiming to estimate species  
25 presence. Occupancy models, as introduced by MacKenzie et al. (2002), are hierarchical models that include  
26 two sub-models. The first sub-model describes the ecological process, occupancy, typically of interest to  
27 ecologists. The second sub-model accounts for measurement errors arising from imperfect detection. A site is  
28 said occupied when at least one individual went through it (Emmet et al., 2021). At a broader scale, occupancy  
29 corresponds to the proportion of sites within a study area that are occupied by the species (MacKenzie et al.,  
30 2002). The occupancy model proposed by MacKenzie et al. (2002) uses binary data (0 if the species was not  
31 detected, 1 if it was) at each site during each sampling occasion. This model has underpinned numerous  
32 occupancy studies in the last two decades, and was refined or adapted by many modelers (Bailey et al., 2014).  
33 These adaptations have given rise to new occupancy models, most of them aiming to mirror more closely the  
34 expected ecological or detection conditions, impacting the input data required by each model. We here focus  
35 on static occupancy models, in which the occupancy state of a site is assumed constant, without

36 extinction-colonisation processes, as opposed to dynamic occupancy models.

37 Ecological models, including occupancy models, have historically been developed to analyse observation data  
38 collected by field operators during one or several short sampling occasions (Bailey et al., 2014). However, the  
39 deployment of sensors involves continuous data collection, often over long time periods (*e.g.* Cove et al., 2021;  
40 Cusack et al., 2015; Moore et al., 2020). For instance, Kays et al. (2020) recommend deploying sensors for three  
41 to five weeks at multiple locations to estimate relative abundance, occupancy, or species richness. Short-term  
42 deployments can equate traditional discrete sampling occasions. However, when sensors are stationed at the  
43 same location for extended periods, data is often discretised in order to use traditional models in discrete time.  
44 We suggest using the term **session** for these discretised time intervals, because they differ from traditional  
45 sampling occasions in two respects: (1) sampling occasions are determined before the data collection,  
46 whereas the discretisation is done after the data has been collected; and (2) sessions occur consecutively  
47 without any gaps between them, while the traditional sampling occasions are separated by periods of time  
48 when the site is not monitored.

49 Occupancy discrete-time models have been around for 20 years and are commonly used because they are  
50 relatively simple to implement. However, continuous-time ecological modelling is not new. The first mention  
51 of a continuous-time model in the capture-recapture literature dates back to Becker (1984). It was not until the  
52 advent of sensors, which highlighted the limitations of discrete-time models, that modelers began to turn  
53 towards continuous-time models (Kellner et al., 2022; Rushing, 2023; Schofield et al., 2018). Nonetheless,  
54 continuous-time models are not a universal cure-all. Each family of models have their pros and cons.

55 **Discretisation simplifies the information.** Discretisation is, in other words, an aggregation of data into  
56 sessions. This aggregation simplifies the data and blurs the residual variability, which can help in interpreting  
57 broad observed trends. But simplification involves information loss. Because accurately estimating occupancy  
58 relies on precisely assessing imperfect detection (Kellner & Swihart, 2014; Kéry & Schmidt, 2008), having more  
59 information about detection patterns could provide valuable insights, helping to disentangle the observation  
60 process from the ecological process of interest. This may lead to more accurate estimations of static  
61 occupancy. Dynamic occupancy models could represent the occupancy state in continuous time to go even  
62 further, potentially revealing fine patterns with ecological significance.

63 **Discretisation is arbitrary.** Researchers usually choose the aggregation period so that the detection  
64 probability is not too low, and the occupancy probability is not estimated at its boundaries (close to 0 or 1).  
65 Schofield et al. (2018) highlighted that the chosen session length can impact abundance estimates with  
66 discrete-time capture-recapture models. Hence, it most likely impacts occupancy models outputs, as  
67 capture-recapture and occupancy models are very similar (the individual capture history equates the site  
68 "detection history", MacKenzie et al., 2002). Eliminating arbitrary discretisation in occupancy modelling can  
69 enhance the method objectivity and reproducibility, and is expected to improve result reliability, at least  
70 compared to a non-optimal discretisation.

71 **Model complexity and data availability.** Models with a continuous-time detection process are likely to  
72 overcome the limitations mentioned above. Furthermore, harnessing the richness of continuous-time data,  
73 researchers can customise models to replicate species-specific observation processes, providing valuable  
74 insights into animal behaviour and activity patterns (e.g. Distiller et al., 2020, with continuous-time spatial  
75 capture-recapture models). However, the potential drawback is the complexity of such models, that may  
76 render them less adapted to derive ecological insights such as occupancy from small data sets. Additionally, if  
77 the system is not assumed to be constant over time, continuous-time covariates are necessary for a  
78 continuous-time model, and these covariates are often not readily available.

79 **Importance of discretisation versus distribution law.** In response to Schofield et al. (2018),  
80 Zhang and Bonner (2020) demonstrated that differences in inference with capture-recapture discrete-time  
81 models were not attributed to varying data discretisation scales but rather to the choice of the distribution law  
82 for modelling the detection process. When dealing with mathematically equivalent models, both continuous-  
83 and discrete-time models would yield equivalent outcomes. Consequently, the decision between discrete- and  
84 continuous-time models is less significant and impactful than choosing a model with a different distribution.  
85 We also note that the choice of distribution law to model detection influences the model parameters. For  
86 instance, we find detection rates more practical than detection probabilities, improving the comparability of  
87 studies as probabilities are only meaningful at the scale of the discretised period.

88 Users select an occupancy model depending on a trade-off between model performance and implementation  
89 cost. This cost encompasses factors such as model familiarity, programming if necessary, and accessibility to  
90 data, all of which can be influenced by the complexity of the model. Existing comparisons between discrete-  
91 and continuous-time models are presented in papers introducing new continuous models, focusing on  
92 evaluating the new model formulation, and often limited to just two models  
93 (Emmet et al., 2021; Guillera-Aroita et al., 2011). Other studies compare models that use  
94 time-to-first-detection data with those using repeated measures to improve field survey methods conducted  
95 by human observers (Halstead et al., 2021; Henry et al., 2020; Priyadarshani et al., 2022).

96 In this paper, we investigate whether continuous-time modelling is beneficial for occupancy estimation using  
97 sensor-based observation data and under which circumstances. We conduct a comprehensive comparison of  
98 five occupancy models, varying in the complexity of their detection processes. These five models cover a large  
99 scope of single-species static occupancy models with no false positives (MacKenzie et al., 2004). We omitted  
100 time-to-first-detection models. Although often appropriate to analyse data from time-optimised  
101 human-based surveys  
102 (Halstead et al., 2021; Henry et al., 2020; Priyadarshani et al., 2022; Priyadarshani et al., 2024), using only the  
103 first detection from sensor-based data amounts to discarding lots of informative data. Therefore, we  
104 considered only time-to-each-detection for continuous-time models. We also omitted models that consider  
105 abundance-induced detection heterogeneity, like the Royle-Nichols model (Royle & Nichols, 2003).

106 We compare the ability of occupancy models to retrieve the simulated occupancy probability using  
107 complementary comparison metrics, measuring accuracy, bias, and precision (Liemohn et al., 2021). To fully  
108 control the environment, we simulate continuous detection data. This allows us to explore how the rarity and  
109 elusiveness of the target species influences the model's ability to retrieve the occupancy. We also simulate  
110 extreme cases to refine the models' application limits. As an illustrative example, we used the five compared  
111 models to analyse continuously collected empirical lynx (*Lynx lynx*) data observed through camera traps. We  
112 aim to offer recommendations for choosing discrete- or continuous-time models and to discuss various  
113 considerations that researchers should address when analysing fauna observation data collected through  
114 sensors.

## 115 **2 Material and methods**

### 116 **2.1 Occupancy models**

117 In this section, we describe the five hierarchical occupancy models compared, with an ecological process  
118 modelling presence or occupancy, and an observation process addressing imperfect detection. The occupancy  
119 sub-model is consistent across all five models, while the detection sub-model differs. Fig. 1 provides an  
120 overview of the formulation and input data of the considered models, which are described in detail in the  
121 following paragraphs. The mathematical notation is listed in Table 1.

#### 122 **2.1.1 Occupancy sub-model**

123 Across all five models, the occupancy sub-model is identical, assuming that the occupancy state of site  $i$ ,  $Z_i$ ,  
124 follows a Bernoulli distribution with parameter  $\psi$ , the occupancy probability. The sites are assumed  
125 independent, regarding both occupancy and detection.

$$Z_i \stackrel{i.i.d.}{\sim} \text{Bernoulli}(\psi), \quad i = 1, \dots, I. \quad (1)$$

126 If the species is detected at least once in a site, that site is considered occupied, assuming no false positives.  
127 Temporal changes in occupancy are not considered; for simplicity, we focus on single-season occupancy  
128 models with no covariates.

#### 129 **2.1.2 Detection sub-model**

130 Two models rely on the time discretisation of the sensor-based observation data (Bernoulli Process (BP) and  
131 Counting Occurrences Process (COP)), while three others consider the detection as the realisation of a  
132 continuous-time stochastic process (Poisson Process (PP), Two-state Markov Modulated Poisson Process  
133 (2-MMPP) and Interrupted Poisson Process (IPP)). Their growing complexity, associated with an expected  
134 closer alignment with reality, influences the input data required for each model. Our primary focus is to

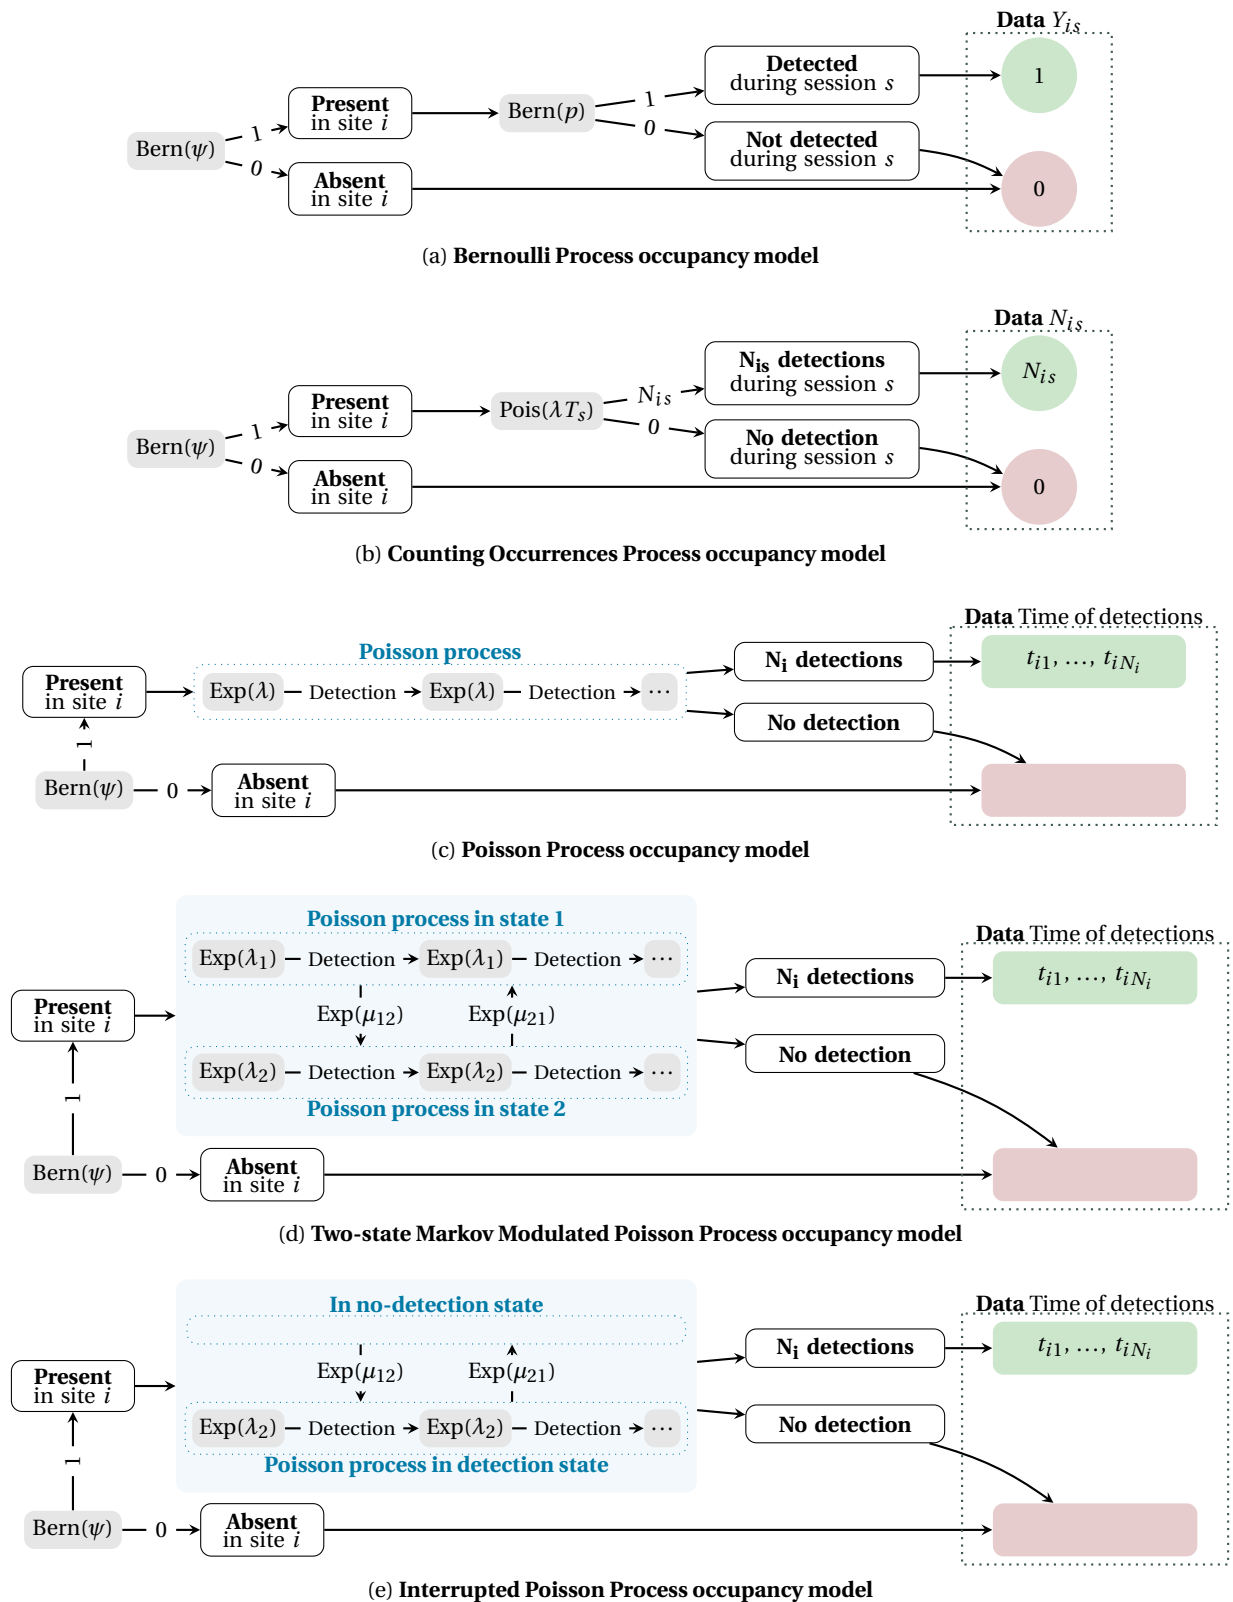

**Figure 1: Five occupancy models compared.** With:  $\psi$  the occupancy probability; (a) **BP**  $p$  the detection probability;  $Y_{i,s}$  the detection/non detection observed in site  $i$  during session  $s$ ; (b) **COP**  $\lambda$  the detection rate;  $T_s$  the duration of a session;  $N_{i,s}$  the number of detections in site  $i$  during session  $s$ ; (c) **PP**  $\lambda$  the detection rate;  $N_i$  the number of detections in site  $i$ ;  $t_{i,k}$  the time of the  $k^{\text{th}}$  detection in site  $i$ ; (d) **2-MMPP** and (e) **IPP**  $\lambda_1$  the detection rate in state 1;  $\lambda_2$  the detection rate in state 2;  $\mu_{12}$  the switching rate from state 1 to state 2;  $\mu_{21}$  the switching rate from state 2 to state 1;  $N_i$  the number of detections in site  $i$ ;  $t_{i,k}$  the time of the  $k^{\text{th}}$  detection in site  $i$ .

Table 1: **Notation.**

|                                                                                 |                                                                                    |
|---------------------------------------------------------------------------------|------------------------------------------------------------------------------------|
| $I$                                                                             | Number of sites                                                                    |
| $\psi$                                                                          | Occupancy probability                                                              |
| $Z_i$                                                                           | Occupancy state of site $i$ (present = 1, absent = 0)                              |
| $T_i$                                                                           | Deployment's duration in site $i$                                                  |
| $N_{it}$                                                                        | Number of detections of the species in site $i$ during $t$                         |
| $p_t$                                                                           | Probability of detecting at least one individual during $t$                        |
| $n_{sim}$                                                                       | Number of simulations per scenario                                                 |
| <b>Discrete-time occupancy models</b>                                           |                                                                                    |
| $T_s$                                                                           | Duration of a discretised session                                                  |
| $S$                                                                             | Number of sessions during $T_i$                                                    |
| <i>Bernoulli Process</i>                                                        |                                                                                    |
| $Y_{is}$                                                                        | Species detected in site $i$ during session $s$ (detection = 1, non-detection = 0) |
| $p$                                                                             | Probability of detecting at least one individual during $T_s$                      |
| <i>Counting Occurrences Process</i>                                             |                                                                                    |
| $N_{is}$                                                                        | Number of detections of the species in site $i$ during session $s$                 |
| $\lambda$                                                                       | Detection rate                                                                     |
| <b>Continuous-time occupancy models</b>                                         |                                                                                    |
| $N_i$                                                                           | Total number of detections of the species in site $i$                              |
| $t_{ik}$                                                                        | Time of the $k^{\text{th}}$ detection in site $i$                                  |
| <i>Poisson Process</i>                                                          |                                                                                    |
| $\lambda$                                                                       | Detection rate                                                                     |
| <i>Two-state Markov Modulated Poisson Process ; Interrupted Poisson Process</i> |                                                                                    |
| $\lambda_1$                                                                     | Detection rate in state 1, with $\lambda_1 = 0$ for the IPP model                  |
| $\lambda_2$                                                                     | Detection rate in state 2                                                          |
| $\mu_{12}$                                                                      | Switching rate from state 1 to state 2                                             |
| $\mu_{21}$                                                                      | Switching rate from state 2 to state 1                                             |
| $\pi_1$                                                                         | Time-ratio spent in state 1 when the system is stationary                          |
| $\pi_2$                                                                         | Time-ratio spent in state 2 when the system is stationary                          |



135 determine if more complex representations of the detection process lead to improved estimates of occupancy  
136 probability, with minimised error and bias.

137 **Bernoulli Process (BP)** In the classical occupancy model proposed by MacKenzie et al. (2002), the raw data  
138 are aggregated and simplified. The continuous data are aggregated into  $S$  sessions of duration  $T_s$ , and simplified  
139 into the observation  $Y_{is}$ , which is 1 if at least one detection occurs during session  $s$  at site  $i$ , and 0 otherwise.  
140 Conditionally on the occupancy state  $Z_i$  of site  $i$ , the model assumes that the distribution of the variable of  
141 interest  $Y$  depends on  $p$  the probability of detecting at least one individual during a session:

$$\begin{cases} Y_{is}|Z_i = 1 & \overset{i.i.d}{\sim} \text{Bernoulli}(p), \quad i = 1, \dots, I, s = 1, \dots, S, \\ Y_{is}|Z_i = 0 & \overset{i.i.d}{\sim} 0 \end{cases} \quad (2)$$

142 **Counting Occurrences Process (COP)** In the BP model, detecting few or many individuals during a session  
143 leads to the same observation  $Y_{is} = 1$ , although it corresponds to very different situations. We simplified the  
144 approach proposed by Emmet et al. (2021) to avoid references to secondary sessions and to use probability. As  
145 a result, its likelihood has been adjusted and is provided in supplementary information.

146 Although the data is aggregated by session like in the BP model, more information is retained since this  
147 approach models  $N_{is}$ , the number of individuals seen at site  $i$  during session  $s$ . Conditionally on the  
148 occupancy state  $Z_i$  of site  $i$ , as it is typical for count data, the COP model assumes that the number of  
149 detections  $N_{is}$  follows a Poisson distribution of parameter  $\lambda$  the detection rate multiplied by  $T_s$  the session  
150 duration:

$$\begin{cases} N_{is}|Z_i = 1 & \overset{i.i.d}{\sim} \text{Poisson}(\lambda T_s), \quad i = 1, \dots, I, s = 1, \dots, S, \\ N_{is}|Z_i = 0 & \overset{i.i.d}{\sim} 0 \end{cases} \quad (3)$$

151 In practical terms, if the time-unit is a day, then when the detection rate  $\lambda = 3$ , there are on average three  
152 individuals detected by day. If each session lasts a week,  $T_s = 7$ , then there are on average  $\lambda T_s = 3 \times 7 = 21$   
153 individuals detected per session. The probability of detecting  $k$  individuals during a session is  $(\lambda T_s)^k e^{-\lambda T_s} / k!$ .  
154 With this example, in an occupied site during a session, there is a 8.67% chance of detecting 21 individuals, a  
155 0.35% chance for 10 individuals, and a  $7.58e^{-8}\%$  chance of detecting nothing.

156 **Poisson Process (PP)** Unlike the two previous models which required data discretisation, the PP occupancy  
157 model proposed by Guillera-Aroita et al. (2011) uses the time of detections as data, with  $t_{ij}$  the time of the  $j^{\text{th}}$   
158 detection in site  $i$ . These raw, unaggregated data retain all of its information. The time of detections are  
159 transformed into interdetection times to calculate the likelihood of these data given the model and its  
160 parameters. The first interdetection time is usually defined as the time between the deployment beginning  
161 and the first detection, the second as the time between the first detection and the second, and so forth. The

162 last value in this vector can be defined as the time between the last detection and the end of deployment. If the  
163 time at which the deployment ended is not known, *e.g.* because the battery died, the likelihood can be adapted  
164 so that this last value can be the time between the second-to-last detection and the last detection  
165 (Guillera-Arroita et al., 2011).

166 When the site  $i$  is occupied, the detection process is modeled as a homogeneous Poisson point process of  
167 parameter  $\lambda$ , the detection rate. This means that the interdetection times are exponential variables with rate  $\lambda$ .  
168 In practical terms, if the time-unit is a day, then a detection rate  $\lambda = 3$  means that on average, three individuals  
169 are seen per day. The average time between two detections is  $1/3$  of a day.

170 One property of a Poisson process of parameter  $\lambda$  is that the number of detections over a period of time  $T$   
171 follows a Poisson distribution with parameter  $\lambda T$ . This model is therefore mathematically equivalent to the  
172 COP model presented above (Zhang & Bonner, 2020). Nonetheless, using the raw data could enable ecologists  
173 to delve deeper and consider the detection rate heterogeneity with the model residuals.

174 **Two-state Markov Modulated Poisson Process (2-MMPP)** The 2-MMPP occupancy model was also proposed  
175 by Guillera-Arroita et al. (2011) and uses the time of detection events as data, transformed into interdetection  
176 times. Unlike the PP occupancy model, which assumes that detection events happen at an homogeneous rate,  
177 this model incorporates some heterogeneity. This approach is likely more representative for many species,  
178 considering various ecological processes that can lead to temporal clustering in detection events. Examples  
179 include seasonal activity patterns, or, at finer temporal scales, daily activity patterns, and interactions with  
180 other species, among others. In the 2-MMPP occupancy model, when the site  $i$  is occupied, the detection  
181 process is modeled as a system of Poisson processes with two different rates. When the system is in state 1, the  
182 detection events are modeled by a Poisson process of parameter  $\lambda_1$ . In state 2, the rate is  $\lambda_2$ . This is a two-state  
183 continuous-time Markov chain, where the system switches from one hidden state to the other, with parameters  
184  $\mu_{12}$  (switching rate from state 1 to state 2) and  $\mu_{21}$  (switching rate from state 2 to state 1).

185 With day as the time-unit and a set of parameters of  $\lambda_1 = 1$ ,  $\lambda_2 = 5$ ,  $\mu_{12} = 1/15$ ,  $\mu_{21} = 1$ , this means that:

- 186 • State 1 is a low-detection state with 1 detection per day on average ( $\lambda_1$ ), State 2 is a high-detection state  
187 with 5 detections per day on average ( $\lambda_2$ )
- 188 • When the system is in state 1, there is  $1/15$  switch to state 2 per day on average ( $\mu_{12}$ ), corresponding to 15  
189 days spent on average in state 1 before switching to state 2 ( $1/\mu_{12}$ ). When the system is in state 2, there is  
190 1 switch to state 1 per day on average ( $\mu_{21}$ ), corresponding to 1 days spent on average in state 2 before  
191 switching to state 1 ( $1/\mu_{21}$ )
- 192 • The system is in state 1 for 93.75% of the deployment time on average ( $\pi_1$  in Equation 4), and in state 2  
193 for 6.25% of the time ( $\pi_2$  in Equation 4)
- 194 • In an occupied site, there are on average 1.25 detections per day (Equation 5) and the variance of the  
195 number of daily detections is 4.11 (Equation 6)

196 The proportion of time spent in each state when the system is stationary is the steady-state vector  $\Pi$  of the  
 197 Markov chain for a 2-MMPP, is presented in Equation 4 (Fischer & Meier-Hellstern, 1993).

$$\Pi = \begin{pmatrix} \pi_1 & \pi_2 \end{pmatrix} = \begin{pmatrix} \frac{\mu_{21}}{\mu_{12} + \mu_{21}} & \frac{\mu_{12}}{\mu_{12} + \mu_{21}} \end{pmatrix} \quad (4)$$

198 The number of events (here  $N_{it}$  the number of detections at site  $i$  taking place during an observation time  $t$ ) of  
 199 a 2-MMPP is described by its expected value  $\mathbb{E}[N_{it}]$  in Equation 5 and by its variance  $\mathbb{V}[N_{it}]$  in Equation 6 (see  
 200 Supplementary Informations and Bhat, 1992).

$$\mathbb{E}[N_{it}] = (\lambda_1 \pi_1 + \lambda_2 \pi_2) T \quad (5)$$

$$\mathbb{V}[N_{it}] = \left( \lambda_1 \pi_1 + \lambda_2 \pi_2 + \frac{2(\lambda_1^2 + \lambda_2^2)}{\mu_{12}^2 \mu_{21}^2 \left( \frac{1}{\mu_{12}} + \frac{1}{\mu_{21}} \right)^3} \right) T \quad (6)$$

201 The probability of having at least one detection during an observation period of duration  $T$ , written  $p_t$ , is given  
 202 in Equation 7, with  $exp$  the matrix exponential function (from Guillaera-Arroita et al., 2011, section 4.2).

$$p_t = 1 - \Pi \times exp \left[ \left( \begin{pmatrix} -\mu_{12} & \mu_{12} \\ \mu_{21} & -\mu_{21} \end{pmatrix} - \begin{pmatrix} \lambda_1 & 0 \\ 0 & \lambda_2 \end{pmatrix} \right) \times T \right] \times \begin{pmatrix} 1 \\ 1 \end{pmatrix} \quad (7)$$

203 MMPPs are a type of Cox processes (Cox, 1955). 2-MMPPs can also be referred to as switched Poisson processes  
 204 (SPP, Arvidsson and Harris, 1991) or as a doubly stochastic Poisson processes (Bhat, 1992, 1994). For simplicity,  
 205 we focused on two-state models in this comparison. However, in specific ecological contexts, considering more  
 206 states may be relevant. For more informations on MMPPs in general, with possibly more than 2 states, see  
 207 Fischer and Meier-Hellstern (1993), Guillaera-Arroita (2012), and Rydén (1994).

208 **Interrupted Poisson Process (IPP)** The IPP occupancy model is a special case of a 2-MMPP where there are  
 209 no detections in one of the two states. This modelling approach is intuitive for ecological settings where we  
 210 expect periods without detection, such as diurnal species (active and observed during the day, inactive thus  
 211 unobserved at night) or gregarious species (extended periods with no detections, and at the passage of a herd,  
 212 shorter periods with numerous detection events). In such contexts, the IPP model, more parcimonious with  
 213 one less parameter, could be more adapted than the 2-MMPP model, which might still estimate a near-zero  
 214 detection rate and produce equivalent results. Since usually,  $\lambda_1 < \lambda_2$  (Skaug, 2006), an IPP is a 2-MMPP with  
 215  $\lambda_1 = 0$  constrained.

## 216 2.2 Simulation study

### 217 2.2.1 Continuous detection data simulation

218 We simulated detection data in  $I = 100$  sites, with one deployment per site of  $T_i = 100$  time-units. For the sake  
 219 of simplicity, one time-unit corresponds to one day throughout this article. We simulated data with various  
 220 occupancy probability and detection parameters. All simulation parameters are described in Table 2. In  
 221 detection scenarios (a) and (b), we simulated extreme cases of species elusiveness to identify the models'  
 222 limits and behaviour in extreme situations, even if we expect these to produce insufficient data to perform  
 223 occupancy modelling. We carried out  $n_{sim} = 500$  simulations per simulation scenario.

Table 2: **Simulation parameters.** With  $p_{100}$  the probability of having at least one detection during a deployment of  $T_i = 100$  days at an occupied site (Equation 7);  $p_1$  the probability of having at least one detection during 1 day (Equation 7);  $\mathbb{E}[N_{100}]$  the expected number of detections during a deployment of  $T_i = 100$  days at an occupied site (Equation 5);  $\mathbb{V}[N_{100}]$  the variance of the number of detections during a deployment of  $T_i = 100$  days at an occupied site (Equation 6)

| (a) General parameters |                               | (b) Parameters of the seven detection scenarios |             |             |            |            |           |       |                       |                       |
|------------------------|-------------------------------|-------------------------------------------------|-------------|-------------|------------|------------|-----------|-------|-----------------------|-----------------------|
| $I$                    | 100 sites                     |                                                 | $\lambda_1$ | $\lambda_2$ | $\mu_{12}$ | $\mu_{21}$ | $p_{100}$ | $p_1$ | $\mathbb{E}[N_{100}]$ | $\mathbb{V}[N_{100}]$ |
| $T_i$                  | 100 days                      | (a)                                             | 0.00        | 1.00        | $1/15$     | 24         | 0.23      | 0.003 | 0.28                  | 0.30                  |
| $n_{sim}$              | 500 simulations per scenario  | (b)                                             | 0.00        | 5.00        | $1/15$     | 24         | 0.68      | 0.01  | 1.39                  | 1.96                  |
| $\psi$                 | 0.10, 0.25, 0.50, 0.75, 0.90  | (c)                                             | 0.00        | 1.00        | $1/15$     | 1          | 0.96      | 0.04  | 6.25                  | 17.24                 |
| $T_s$                  | 30 (month), 7 (week), 1 (day) | (d)                                             | 0.25        | 0.25        | $1/15$     | $1/10$     | 1.00      | 0.22  | 25.00                 | 61.00                 |
|                        |                               | (e)                                             | 0.00        | 5.00        | $1/15$     | 1          | 1.00      | 0.09  | 31.26                 | 306.03                |
|                        |                               | (f)                                             | 0.00        | 1.00        | $1/15$     | $1/10$     | 1.00      | 0.26  | 40.01                 | 327.98                |
|                        |                               | (g)                                             | 0.00        | 5.00        | $1/15$     | $1/10$     | 1.00      | 0.42  | 200.06                | 7399.34               |

224 The occupancy status of each site was determined as the outcome of a Bernoulli trial with probability  $\psi$ . The  
 225 detection process was simulated as a 2-MMPP of parameters  $\lambda_1, \lambda_2, \mu_{12}, \mu_{21}$ , using R version 4.2.3 (R Core Team,  
 226 2023). The state at the beginning of a deployment was drawn according to the stationary distribution, as a  
 227 random sampling with probability  $\pi_1$  (*resp.*  $\pi_2$ ) of being in state 1 (*resp.* 2). Until the end of the deployment,  
 228 the time to next event was a draw from an exponential distribution with parameter  $\mu_{12} + \lambda_1$  in state 1, and with  
 229 parameter  $\mu_{21} + \lambda_2$  in state 2. In state 1, this event was either a detection with probability  $\frac{\lambda_1}{\mu_{12} + \lambda_1}$ , or a switch to  
 230 state 2. In state 2, it was either a detection with probability  $\frac{\lambda_2}{\mu_{21} + \lambda_2}$ , or a switch to state 1 (Fig. 2).

231 **Discretisation into sessions** For the two models that required discretisation into sessions, we used three levels  
 232 of discretisation: monthly, weekly, and daily. Incomplete sessions are deemed invalid and will be excluded from  
 233 the analysis. Consequently, when the data is discretised into months, there are three sessions consisting of 30  
 234 days each, and the detection data of the last 10 days of each deployment is disregarded. Similarly, when the data  
 235 is discretised into weeks, there are 14 sessions of 7 days each, the last 2 days of each deployment is discarded.

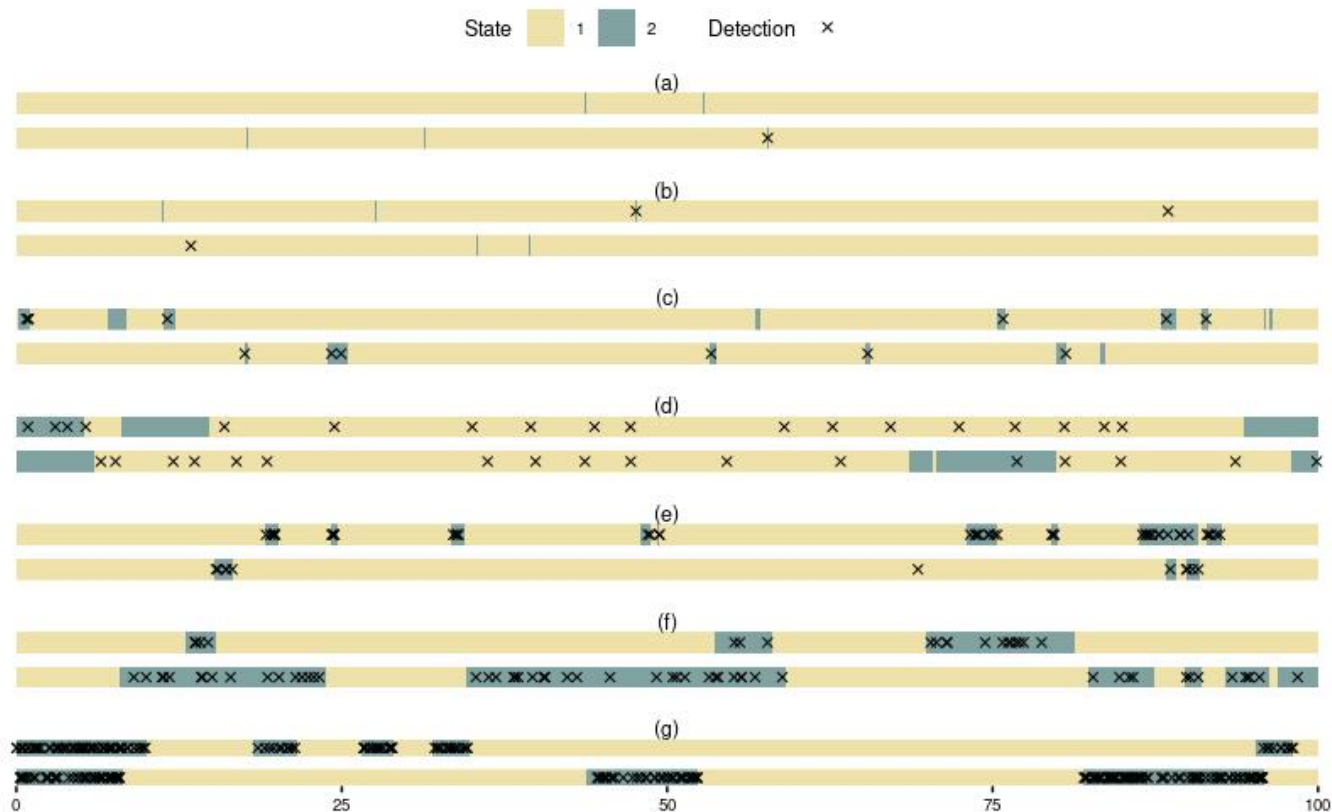

Figure 2: **Simulated detection data.** To help understand the impact of the detection parameters, two examples are given per detection scenario. With scenarios (a to g) described in Table 2. The detection process is simulated in an occupied site during 100 days.

### 236 2.2.2 Frequentist parameter estimation

237 We estimated models parameters by maximum likelihood estimation and implemented it in R version 4.2.3 (R  
 238 Core Team, 2023). For the COP, PP, 2-MMPP and IPP models, we used the `optim` function from the `stats`  
 239 package (R Core Team, 2023) to maximise the log-likelihood. For the BP model, we used the function `occu`  
 240 from the `unmarked` package version 1.3.2 (Fiske & Chandler, 2011), which calls the same `optim` function. We  
 241 used the Nelder-Mead algorithm to maximise the likelihood. To reduce the optimisation time, we used the  
 242 simulated parameters as the initial parameters to start the optimisation algorithm. The likelihood  
 243 maximisation methodology was equivalent for the 5 models, making their results comparable. In order to  
 244 perform unconstrained optimisation, we applied a logit transformation to the probabilities ( $\psi$ ,  $p$ ) and a log  
 245 transformation to rates ( $\lambda$ ,  $\lambda_1$ ,  $\lambda_2$ ,  $\mu_{12}$  and  $\mu_{21}$ ). In addition, we fitted the models with the BFGS optimisation  
 246 algorithm. The results are not shown here but presented in supplementary information.

### 247 2.2.3 Performance comparison for occupancy probability estimation

248 For each simulation scenario, we calculated the Root Mean Square Error (RMSE, Equation 8) as an error metric,  
 249 measuring the absolute difference between the models' point estimates of occupancy probability ( $\hat{\psi}$ ) and the  
 250 ground-truth occupancy probability ( $\psi$ ), used to simulate data sets of this simulation scenario.

$$\text{RMSE} = \sqrt{\frac{1}{n_{sim}} \sum_{j=1}^{n_{sim}} (\hat{\psi}_j - \psi)^2} = \sqrt{(\hat{\psi} - \psi)^2} \quad (8)$$

251 To complete this metric, we calculated absolute bias (AB, Equation 9) to better understand if this error was due  
 252 to under-estimation or over-estimation of  $\psi$ .

$$\text{AB} = \frac{1}{n_{sim}} \sum_{j=1}^{n_{sim}} (\hat{\psi}_j - \psi) = \overline{(\hat{\psi} - \psi)} \quad (9)$$

253 To compare the distributions of the point estimates  $\hat{\psi}$  of the five different models and the different  
 254 discretisations for BP and COP, we performed a Kruskal-Wallis test for each simulated scenario. We also  
 255 conducted Wilcoxon tests with Bonferroni correction and visualised the distribution of  $\hat{\psi}$ .

256 We calculated for each inference the 95% confidence interval (CI) of the occupancy probability. To summarise  
 257 this information for all the  $n_{sim}$  simulations by model in each simulation scenario, we used two metrics, the  
 258 coverage (Equation 10) and the average range of the confidence interval (ARCI, Equation 11). We note  $CI_l$  and  
 259  $CI_u$  the lower and upper bounds of the 95% confidence interval of the estimated occupancy probability.

260 Coverage is the proportion of simulations for which the true simulated occupancy probability ( $\psi$ ) is within the  
 261 95% CI of the estimated occupancy probability. In other words, coverage can be interpreted as the percentage  
 262 of good predictions of the occupancy probability by a model.

$$\text{Coverage} = \frac{1}{n_{sim}} \sum_{j=1}^{n_{sim}} I(CI_l \leq \psi \leq CI_u) = \overline{I(CI_l \leq \psi \leq CI_u)} \quad (10)$$

263 The average range of the 95% confidence interval measures the precision of the estimation, with the width of  
 264 the confidence interval. It completes coverage, since even a model with poor performances can have a coverage  
 265 of 100%: If its range is 1, it means that this model predicts that the occupancy probability is between 0 and 1.

$$\text{ARCI} = \frac{1}{n_{sim}} \sum_{j=1}^{n_{sim}} CI_u - CI_l = \overline{CI_u - CI_l} \quad (11)$$

### 266 2.3 Empirical comparison with lynx detection data

267 We applied the five occupancy models to empirical data from Gimenez et al. (2022). We analyzed data from 11  
 268 camera-trap locations in Ain county, France, monitored from February 2017 to May 2019. Monitoring durations  
 269 per site were heterogeneous, ranging from 148 to 801 days (Fig. S8), totaling 5396 camera-trap days across all 11  
 270 sites. We here focus on lynx (*Lynx lynx*) occupancy. Lynx were detected in 9 sites out of 11, with 203 detections in  
 271 total, ranging from 1 to 59 detections per site (Fig. S8). For the two discrete models, BP and COP, we discretised  
 272 the data similarly to the simulation study: into monthly, weekly, and daily intervals (Fig. S9). We discarded

273 data from incomplete sessions, during which a site was monitored only partially and not throughout the entire  
274 session.

275 We estimated parameters following the method described in Section 2.2.2, consistent with the simulation study  
276 approach, with the exception of the optimisation algorithm starting points. We used intuitive starting points,  
277 such as the ratio of sites with at least one detection for  $\psi$ . Starting points for the models' different detection  
278 parameters are detailed in our code. We did not include covariates in the analysis. For each parameter of  
279 each model, we retrieved its point estimate and derived its 95% and 50% confidence intervals from the Hessian  
280 matrix.

## 281 **3 Results**

### 282 **3.1 Simulation study**

283 For easily detectable species (detection scenarios d, e, f, and g), all models retrieve well the simulated occupancy  
284 probability. Bias ranges from  $-0.0094$  to  $0.0025$  (Fig. 3) and RMSE are less than  $0.060$  (Fig. S2). With those  
285 detection parameters, the Kruskal-Wallis tests indicate that there are no statistically significant differences in  
286 the distribution of  $\hat{\psi}$  between models, except with simulation parameters (e) and  $\psi = 0.1$ , (e) and  $\psi = 0.9$  and  
287 (f) and  $\psi = 0.9$  (Table S3). The Wilcoxon tests indicate that there is no difference in medians with (e) and  $\psi = 0.1$   
288 (Fig. S3). With (e) and  $\psi = 0.9$  and (f) and  $\psi = 0.9$ , only the BP model with daily sessions differs from the others,  
289 with a slight underestimation of  $\psi$  (Fig. 3).

290 For elusive species (detection scenario c), the BP model's ability to retrieve the simulated occupancy probability  
291 is slightly inferior to other models, with a RMSE ranging from  $0.057$  to  $0.121$  while the RMSE of other models  
292 are still less than  $0.060$ . (Fig. S2). The Wilcoxon tests (Fig. S3) indicate differences between BP and the other  
293 models, and this difference depends on the discretised session duration. The distribution of  $\hat{\psi}$  with BP is wider  
294 than for the other models with the same simulated data (Fig. S1).

295 For highly elusive species (detection scenarios a and b), all five models reach their limits. BP, COP and PP tend  
296 to overestimate  $\psi$ , whereas IPP and 2-MMPP tend to underestimate  $\psi$  (Fig. 3). BP tend to estimate  $\psi$  at 0 or  
297 most often at 1 (Fig. S1). COP and PP point estimates of  $\psi$  have similar distributions, both are widely spread  
298 (Fig. S1). IPP and 2-MMPP tend to underestimate  $\psi$ , with a tighter distribution for its point estimate, which  
299 often does not include the simulated value of  $\psi$  (Fig. S1).

300 It was not always possible to calculate the confidence interval (CI) of the occupancy probability estimate, when  
301 the Hessian matrix was not invertible. This occurred in two main cases in our study: when there were not many  
302 sessions with detections in the BP model, or when  $\lambda_1$  was estimated to zero in the 2-MMPP model. As a result,  
303 the 2-MMPP CIs are not interpretable with detection scenarios other than (d), where data were simulated as an  
304 IPP.

305 For easily detectable species (detection scenarios e, f and g), all models have similar coverages (Fig. S4) and

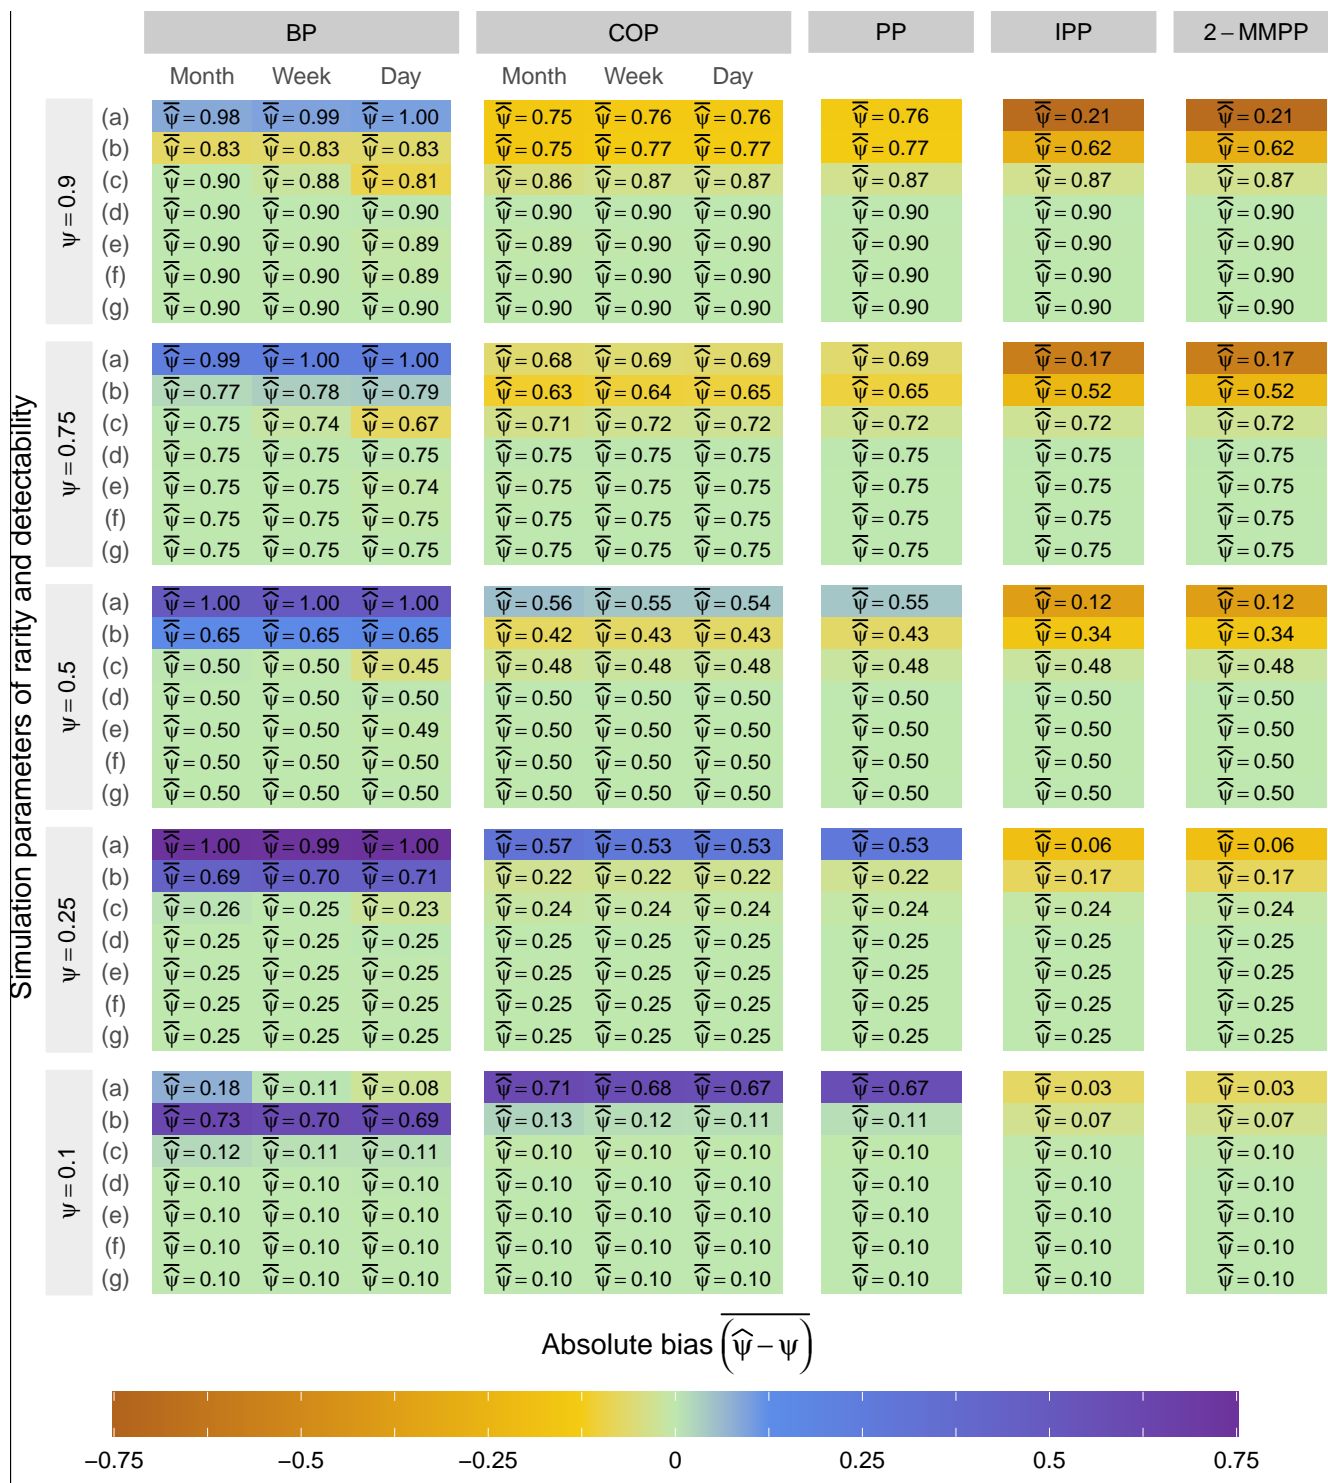

Figure 3: **Absolute bias of the occupancy probability point estimate.** Depending on  $\psi$  the simulated occupancy probability and detection scenarios as described in Table 2. The average value of the occupancy probability point estimate  $\hat{\psi}$  is inside each cell. For two scenarios characterised by low occupancy and detection probabilities, certain repetitions failed to yield any data. With no detection within any of the sites, it was impossible to infer parameters. With detection parameters (a) and  $\psi = 0.25$ , 494 simulations were used to estimate the models' ability to retrieve the simulation parameters. With detection parameters (a) and  $\psi = 0.1$ , only 423 simulations were used.



306 occupancy probability CI ranges (Fig. S5). As detectability decreases, the CIs widens for BP, COP and PP,  
 307 although this is more marked and quicker for BP than for COP and PP (Fig. S5). The IPP CIs do not widen, but  
 308 the coverage drops (Fig. S4).

### 309 3.2 Application to lynx occupancy

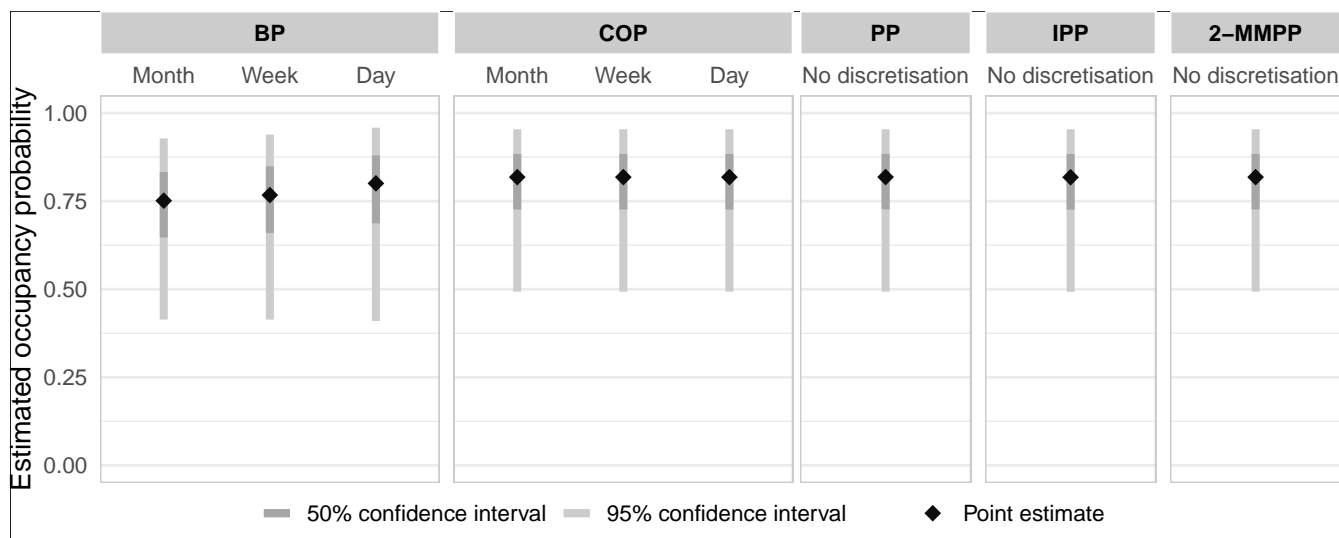

Figure 4: **Occupancy probability estimation with the lynx data set from Gimenez et al. (2022) in the Ain County, France.**

310 Lynx occupancy estimates are similar across all five model (Fig. 4). The COP model, regardless of the session  
 311 duration, and the three continuous models (PP, IPP, and 2-MMPP), converge to an estimated occupancy  
 312 probability of 0.82, with identical confidence intervals (95% CI: 0.49 to 0.95, 50% CI: 0.73 to 0.88) (Fig. 4, Table  
 313 S4). Although the BP model produced a slightly different point estimate, ranging between 0.75 and 0.80  
 314 depending on the session duration, it remains in close proximity to the estimates of the other four models  
 315 (Fig. 4, Table S4).

316 Regarding detectability, the BP model with daily sessions estimates the probability of detecting at least one lynx  
 317 in a day at  $p_1 = 0.008$  (95% CI: 0.006 to 0.012, Table S4). Models assuming homogeneous detection rates (COP,  
 318 PP) estimate 0.045 detection events per day (95% CI: 0.039 to 0.052, Table S4), resulting in an expected average  
 319 of  $\mathbb{E}[N_{100}] = 0.045 \times 100 = 4.5$  detection events in 100 days. In comparison to detectability in our simulation  
 320 scenarios, lynx elusiveness likely falls between detection scenario (b) ( $p_1 = 0.01$ ) and scenario (c) ( $\mathbb{E}[N_{100}] =$   
 321 6.25) (Table 2).

322 The 2-MMPP estimates a low detection rate in state 1, close to 0 ( $\widehat{\lambda}_1 < 0.01$ , 95% CI: 0.001 to 0.06, Table S4),  
 323 suggesting that lynx detection events can be modeled by the the IPP model. The IPP model estimates that only  
 324 0.31% of the time is spent in the state with detections, state 2, (Equation 4, with  $\widehat{\mu}_{21} = 0.16$  and  $\widehat{\mu}_{21} = 50.70$ , Table  
 325 S4). The detection rate is estimated at  $\widehat{\lambda}_2 = 14.22$  detection events per day in this state (95% CI: 9.24 to 21.89,  
 326 Table S4).

## 327 **4 Discussion**

328 The focal ecological parameter of interest is the occupancy probability  $\psi$ , which is represented similarly in all  
329 the five models compared. However, the precision of the occupancy estimation is impacted by the quality of the  
330 estimation for the detection process (Kellner & Swihart, 2014; Kéry & Schmidt, 2008). In this study, we focused  
331 on cases in which data is collected continuously, for example with sensors or opportunistic data. We aimed  
332 to evaluate whether modelling the detection process in continuous-time could enhance the precision of the  
333 estimated probability of occupancy.

334 In line with the concept of operating models, commonly used for assessing management strategies  
335 (Butterworth, 1999; Punt et al., 2016), we simulated data under models that aim to get more in line with our  
336 expectations regarding the detection process when observing fauna through sensors. Specifically, we  
337 considered special cases of 2-MMPP, consisting of six scenarios with detections simulated under an IPP  
338 framework (scenarios a, b, c, e, f, g) and one scenario simulated under a PP framework (scenario d). We  
339 intentionally simulated occupancy very simply, not incorporating covariates or variations in abundance,  
340 aiming to focus solely on the detection process for sensor-collected data. Subsequently, we aimed to recover  
341 the simulation parameters, focusing on occupancy probability, using these complex models, as well as simpler  
342 models well-known and widely used by ecologists. By simplifying the information and the detection process,  
343 we asked the question of whether these models are sufficient to estimate the ecological parameter of interest  
344 in a situation that we expect to be close to reality.

345 We expected that continuous models would outperform discrete models in accurately retrieving the simulated  
346 occupancy probability, since detection data simulation aligned with the framework of the continuous models  
347 of our comparison. Moreover, data aggregation by discretisation leads to a loss of information. We expected  
348 this loss to result in less accurate estimates of detection parameters, consequently introducing bias in the  
349 occupancy estimate, given the relationship between occupancy and detection parameters. However, in the  
350 majority of cases where detectability was sufficiently high (with a minimum expectation of 25 detections in  
351 occupied sites throughout the entire deployment), all models produced equivalent results, all were able to  
352 retrieve the occupancy probability well, with little bias and error.

353 For models requiring discrete data, we expected that different discretisations would impact the models  
354 outputs (Schofield et al., 2018), but in most simulated scenarios, that was not the case. Our results indicate  
355 that estimation of  $\psi$  with BP is more impacted by the session duration's choice than with COP. Since COP is  
356 mathematically equivalent to PP (Zhang & Bonner, 2020), minor variations in the occupancy estimates  
357 between session lengths for COP are likely due to data discarding. Our comparison framework could be reused  
358 to further test the impact of discretisation, by choosing more diverse session durations that reuse exactly the  
359 same data - rather than dropping data of incomplete sessions as we did.

360 The BP model, as noted by MacKenzie et al. (2002), tends to produce estimates of  $\psi$  close to one for rare and  
361 elusive species. Our findings align with this observation, suggesting however that elusiveness has a more

362 pronounced impact on this limit than rarity.

363 The COP model was adapted from the model proposed by Emmet et al. (2021). Their model differs from the  
364 one presented here mainly because they considered site use. However, they compared their counting model  
365 with its detection/non-detection equivalent from Bled et al. (2013), much like we compared COP with BP.  
366 Their model estimated occupancy probability with either equivalent or smaller bias compared to the  
367 equivalent detection/non-detection model, which aligns with our results.

368 In a simulation study, Guillera-Aroita et al. (2011) evaluated BP and PP using data generated within a PP  
369 framework. They reported that both models provided reasonably unbiased estimates of occupancy, except for  
370 rare and elusive species. In these cases, BP exhibited greater bias and variance, particularly with larger  
371 discretisation intervals and fewer sessions, which matches our results. They also compared PP and 2-MMPP  
372 using clustered detection data generated within an IPP framework. They noted negative bias in the occupancy  
373 estimates with the PP model, which was not observed in our results. In our study, both models performed  
374 similarly for easily detectable species. However, for elusive species, the 2-MMPP and IPP models exhibited  
375 more pronounced negative bias than the PP and COP models.

376 All five models consistently estimated lynx occupancy in our empirical example, with COP, PP, IPP, and 2-MMPP  
377 estimating occupancy probability at 0.82, while BP provided slightly lower but still very close estimates. Lynx  
378 detectability falls between simulation scenarios (b) and (c), where models began to approach their limits due  
379 to elusiveness in our simulations. As different models produced significantly varied occupancy estimates when  
380 they reached their limits in simulations, the consistent occupancy estimates across models suggest that they  
381 have not yet reached their limits, indicating reliable occupancy estimates.

382 To better define the limitations of these models, we could perform additional comparisons using simulation  
383 scenarios with various detection parameters. Given the impossibility of exhaustively covering all potential  
384 scenarios, we encourage modelers to compare models when encountering borderline cases of occupancy  
385 models applicability, such as potentially insufficient monitoring time in view of the species elusiveness. Our  
386 code is available to use as a base to conduct simulations with parameters adapted to a specific study context  
387 and compare models to choose the best model. Alternatively, researchers and practitioners can analyse their  
388 data with multiple models to ensure the consistency of results across different modelling approaches, as we  
389 did with the lynx data set.

## 390 **4.1 Choosing the appropriate model**

### 391 **4.1.1 Occupancy modelling for easily detectable species**

392 When the species is easily detectable and thus enough observation data have been obtained, all models  
393 accurately estimate the occupation probability. Under these conditions, if the sole aim of a study is to  
394 accurately estimate occupancy, selecting any of these models essentially amounts to choosing the right one.  
395 Therefore, the choice can be guided by other considerations, to find the right balance between performance

396 and execution costs.

397 **Learning and implementation costs** Continuous-time models may be unfamiliar to ecologists, potentially  
398 requiring a steep learning curve to become proficient with these seemingly complex models. For models that  
399 are not readily available, the implementation costs can be substantial for a study. The rise of sensor-based  
400 monitoring and the growing interest have led to efforts to make time-to-detection occupancy models more  
401 accessible for ecologists, such as through R packages like *unmarked* (Kellner et al., 2023). The costs shifts from  
402 fully implementing a model to using existing functions, a faster alternative. We are currently working on adding  
403 the COP, PP, IPP and 2-MMPP models to *unmarked*.

404 **Study objectives** If the primary goal is to estimate the occupancy of the target species, any of the models can  
405 be employed effectively. Simple models, such as BP, COP or PP, require the estimation of only two parameters:  
406 one for occupancy and one for detection. Choosing such a model can enhance interpretability and provide a  
407 greater statistical power than models with more parameters. This is especially advantageous when  
408 incorporating several spatial and temporal covariates into the analysis. Conversely, if the aim is to conduct a  
409 detailed analysis of the target species detection timeline to better understand a species behaviour, analysing  
410 continuous-time data is preferable, as it data holds valuable information that is increasingly lost as data are  
411 more and more aggregated over time. Models that accommodate the detection process in multiple states  
412 could be particularly adapted to unravel animal behaviours, such as temporal activity patterns. The hidden  
413 state could be reconstructed to further enhance the interpretability of these models' parameters.

414 **Temporal auto-correlation** Unlike sampling occasions, consecutive discretised sessions are not temporally  
415 independent (Bailey et al., 2014), and there may be significant temporal auto-correlation (Neilson et al., 2018).  
416 Therefore, discretised session data does not meet the discrete-time model assumption of independence.  
417 However, the PP model has the exact same drawback when considering a constant detection rate, since the  
418 number of events on two disjoint time intervals are independent. In this study, we did not thoroughly  
419 examine the influence of time dependence on occupancy estimates. However, two-state models, introduced  
420 for clustered observation data (Guillera-Arroita et al., 2011), incorporate some time dependence through two  
421 homogeneous detection rates that differ conditional on state. Future studies could explore the impact of time  
422 dependence on occupancy estimates and consider various approaches to account for non-constant detection  
423 rates. These may include Cox processes, where the detection rate is a random variable (Cox, 1955),  
424 time-dependent regression splines (Distiller et al., 2020), or Hawkes processes, a form of self-exciting point  
425 process where the detection rate increases temporarily after a detection event (Hawkes, 1971; Rushing, 2023).

426 **Calculation time** All models were fairly fast to fit, so calculation time should probably not be the main reason  
427 for choosing a model for most studies. We have not robustly evaluated the optimisation time for each model, as  
428 we used different computers with varying characteristics. However, the two-state models seemed significantly  
429 longer to fit than the other models. BP, COP and PP all took less than 6 seconds to fit, even in the simulation

430 scenario with most detections, in which there was 200 detections on average in occupied sites. IPP and 2-MMPP  
431 often took more than a minute, up to 28 minutes.

432 **Detection rate** A detection probability per discretised session, as in the BP model, is relevant only at the  
433 discretisation scale. This is not the case with a detection rate, as used in the discrete-time COP model or in  
434 continuous-time models. We argue that using a detection rate instead of a detection probability would  
435 enhance the comparability among studies. This could simplify the process of experimental design, especially  
436 concerning observation duration, by using the insights from existing literature on the target species. Another  
437 advantage of using a detection rate, as opposed to a probability, is the flexibility to accommodate sessions of  
438 different durations. For instance, in our lynx example, monthly sessions varied in length (28, 30, or 31 days).  
439 We specified this in the COP model to estimate the number of detection per day, an explicit time unit. We  
440 could not do so in the BP model, in which the detection probability is derived per session.

#### 441 **4.1.2 Occupancy modelling for highly elusive species**

442 When the species is highly elusive, the five models we considered provided inaccurate estimates of its presence  
443 probability, exhibiting high bias, error, and a low precision or coverage. The BP model's limits became apparent  
444 at lower species elusiveness compared to the other models. This could be because valuable information gets lost  
445 when simplifying the data into detection and no detection. The 2-MMPP and IPP models showed larger errors  
446 in estimating  $\psi$  compared to the COP and PP models. This might be due to the higher number of parameters  
447 in the 2-MMPP and IPP models (5 and 4, respectively, versus 2 for COP and PP), which would require more  
448 data to fit them correctly. COP and PP models appear to strike a good balance between simplification and  
449 realism. One is discrete, while the other is continuous, but both perform similarly, which is consistent with the  
450 demonstration of Zhang and Bonner (2020) that a Poisson process in continuous time is equivalent to a classical  
451 model with discretisation where the detection process is not a Bernoulli trial but a Poisson distribution draw.

452 However, if the species' high elusiveness resulted in the collection of insufficient observation data, the best  
453 course of action probably is to collect more data by extending the monitoring period (Kays et al., 2020). In  
454 cases where it is expected that the species will be challenging to detect, conducting simulations and  
455 comparing different models with expected detection and occupancy parameters could assist in fine-tuning  
456 the study design and model choice.

457 If obtaining more data is not feasible, it might be best to refrain from running an occupancy model, or at least  
458 approach the results with caution, regardless of the chosen model. In this case, we recommend fitting different  
459 models, particularly when using the two-state models. For these models, our findings indicate that with highly  
460 elusive species, the confidence interval of the estimated  $\psi$  can be narrow but substantially different from the  
461 actual  $\psi$ . This can potentially lead to a misleading perception of model reliability.

## 462 **4.2 Implications for continuous monitoring frameworks**

463 The advanced processors available today offer great computing power, enabling the fast development of  
464 artificial intelligence (AI). Recognising species automatically is becoming more common, on camera-trap  
465 images (Le Borgne & Bouget, 2023), ARUs recordings (Potamitis et al., 2014), or even with sensors networks  
466 (Wägele et al., 2022). AI combined with sensors offers the potential to fully automate the analysis workflow  
467 (Gimenez et al., 2022; Lahoz-Monfort & Magrath, 2021). Overall, sensors and AI have led to a paradigm shift in  
468 the conditions and capabilities of biodiversity monitoring (Besson et al., 2022; Tuia et al., 2022; Zwerts et al.,  
469 2021). With our comparison, we found that modelling occupancy with a continuous-time detection  
470 sub-model is not necessary to estimate occupancy accurately. Therefore, in operational conditions, the  
471 necessary trade-off between accuracy and ease of implementation may turn in favour of discrete-time models,  
472 with easily available data for temporal covariates.

473 Focusing primarily on the temporal aspect of the detection process modelling, we explored a simple version of  
474 occupancy models: single-species, static, with no positive and no abundance-induced heterogeneity. There  
475 are numerous avenues for further investigation. With the emergence of collaborative platforms aggregating  
476 and providing sensor data across large spatiotemporal scales (e.g. Oliver et al., 2023), developing dynamic  
477 occupancy models with continuous-time occupancy sub-models has the potential to enhance our  
478 understanding of extinction-colonisation processes, to get the most out of continuous-time data. Additionally,  
479 we did not consider abundance as a factor influencing detection heterogeneity, although it is a particularly  
480 intuitive consideration for species with highly variable abundance across sites (Royle & Nichols, 2003). Further  
481 research into these models, in conjunction with continuous data, is called for: In N-mixture models,  
482 time-to-first-detection and time-to-each-detection could offer improved estimates compared to binary  
483 detection/non-detection and count data, respectively (Haines et al., 2023; Priyadarshani et al., 2024).  
484 Furthermore, our study did not account for false-positives, and sensor data (e.g., images from camera traps)  
485 can be prone to incorrect species identification. Potential solution, such as using AI confidence scores  
486 (Rhinehart et al., 2022), could be explored further with continuous-time data to consider the complete  
487 workflow, from sensor data to inference.

488 Our results do not only concern sensor data, but all continuously collected data. Opportunistic data, collected  
489 at non-defined and irregular intervals, can be considered as continuously collected and thus pose some of the  
490 same challenges as sensor data (Altwegg & Nichols, 2019; Hsing, 2019). Some studies analyse opportunistic  
491 data using with discrete-time models, discretising data into long sessions (e.g., by year, as in van Strien et al.,  
492 2013), while other are developing new continuous-time frameworks adapted to this particular data (e.g.  
493 Choquet et al., 2017, using continuous-time capture-recapture for individualised opportunistic data). Our  
494 comparison suggests that for future studies aiming to estimate occupancy with unmarked opportunistic data,  
495 both discrete- and continuous-time occupancy models could produce accurate occupancy estimates,  
496 provided that challenges associated with opportunistic data, such as highly variable observation effort, are  
497 effectively addressed.

## **Acknowledgements**

LP benefits from a French government CIFRE grant for PhD students. This work is part of the PSI-BIOM project granted by the French PIA 3 under grant number 2182D0406-A.

We thank the Federations of Hunters from the Jura and Ain counties for sharing the lynx camera trap data. Data collection was carried out through the Lynx Predator Prey Program, which was funded by Auvergne-Rhone-Alpes Region, Ain and Jura departmental Councils, the French National Federation of Hunters, French Environmental Ministry based in Auvergne-Rhone-Alpes and Bourgogne-Franche-Comte Region and the French Office for Biodiversity.

## **Conflict of Interest statement**

The authors declare no conflict of interest.

## **Author Contributions**

- LP: Formal analysis, Investigation, Methodology, Visualisation, Writing – original draft.
- SM, OG, MPE: Validation, Writing – review and editing.
- All authors: Conceptualisation.

## **Code availability**

Code is available at:

<https://oikolab.terroiko.fr:10001/publications/occupancy-modelling-comparison-discrete-continuous>

## References

- Altwegg, R., & Nichols, J. D. (2019). Occupancy models for citizen-science data. *Methods in Ecology and Evolution*, 10(1), 8–21. <https://doi.org/10.1111/2041-210X.13090>
- Arvidsson, A., & Harris, R. (1991). Performance comparison of models of individual and merged bursty traffics. *Sixth Australian Teletraffic Research Seminar*.
- Bailey, L. L., MacKenzie, D. I., & Nichols, J. D. (2014). Advances and applications of occupancy models (E. Cooch, Ed.). *Methods in Ecology and Evolution*, 5(12), 1269–1279. <https://doi.org/10.1111/2041-210X.12100>
- Becker, N. G. (1984). Estimating Population Size from Capture-Recapture Experiments in Continuous Time. *Australian Journal of Statistics*, 26(1), 1–7. <https://doi.org/10.1111/j.1467-842X.1984.tb01261.x>
- Besson, M., Alison, J., Bjerge, K., Gorochofski, T. E., Høye, T. T., Jucker, T., Mann, H. M. R., & Clements, C. F. (2022). Towards the fully automated monitoring of ecological communities. *Ecology Letters*, 25(12), 2753–2775. <https://doi.org/10.1111/ele.14123>
- Bhat, V. N. (1992). Switched poisson process/g/1 queue with service interruptions. *Computers & Operations Research*, 19(8), 751–756. [https://doi.org/10.1016/0305-0548\(92\)90014-V](https://doi.org/10.1016/0305-0548(92)90014-V)
- Bhat, V. N. (1994). Renewal Approximations of the Switched Poisson Processes and Their Applications to Queueing Systems. *Journal of the Operational Research Society*, 45(3), 345–353. <https://doi.org/10.1057/jors.1994.47>
- Bled, F., Nichols, J. D., & Altwegg, R. (2013). Dynamic occupancy models for analyzing species' range dynamics across large geographic scales. *Ecology and Evolution*, 3(15), 4896–4909. <https://doi.org/10.1002/ece3.858>
- Burton, A. C., Neilson, E., Moreira, D., Ladle, A., Steenweg, R., Fisher, J. T., Bayne, E., & Boutin, S. (2015). REVIEW: Wildlife camera trapping: A review and recommendations for linking surveys to ecological processes. *Journal of Applied Ecology*, 52(3), 675–685. <https://doi.org/10.1111/1365-2664.12432>
- Butterworth, D. (1999). Experiences in the evaluation and implementation of management procedures. *ICES Journal of Marine Science*, 56(6), 985–998. <https://doi.org/10.1006/jmsc.1999.0532>
- Choquet, R., Garnier, A., Awuve, E., & Besnard, A. (2017). Transient state estimation using continuous-time processes applied to opportunistic capture–recapture data. *Ecological Modelling*, 361, 157–163. <https://doi.org/10.1016/j.ecolmodel.2017.08.001>
- Cove, M. V., Kays, R., Bontrager, H., Bresnan, C., Lasky, M., Frerichs, T., Klann, R., Lee Jr., T. E., Crockett, S. C., Crupi, A. P., Weiss, K. C. B., Rowe, H., Sprague, T., Schipper, J., Tellez, C., Lepczyk, C. A., Fantele-Lepczyk, J. E., LaPoint, S., Williamson, J., ... McShea, W. J. (2021). SNAPSHOT USA 2019: A coordinated national camera trap survey of the United States. *Ecology*, 102(6), e03353. <https://doi.org/10.1002/ecy.3353>
- Cox, D. R. (1955). Some Statistical Methods Connected with Series of Events. *Journal of the Royal Statistical Society: Series B (Methodological)*, 17(2), 129–157. <https://doi.org/10.1111/j.2517-6161.1955.tb00188.x>
- Cusack, J. J., Dickman, A. J., Rowcliffe, J. M., Carbone, C., Macdonald, D. W., & Coulson, T. (2015). Random versus Game Trail-Based Camera Trap Placement Strategy for Monitoring Terrestrial Mammal Communities (R. Guralnick, Ed.). *PLOS ONE*, 10(5), e0126373. <https://doi.org/10.1371/journal.pone.0126373>



- Distiller, G. B., Borchers, D. L., Foster, R. J., & Harmsen, B. J. (2020). Using Continuous-Time Spatial Capture–Recapture models to make inference about animal activity patterns. *Ecology and Evolution*, 10(20), e6822. <https://doi.org/10.1002/ece3.6822>
- Emmet, R. L., Long, R. A., & Gardner, B. (2021). Modeling multi-scale occupancy for monitoring rare and highly mobile species. *Ecosphere*, 12(7), e03637. <https://doi.org/10.1002/ecs2.3637>
- Fischer, W., & Meier-Hellstern, K. (1993). The Markov-modulated Poisson process (MMPP) cookbook. *Performance Evaluation*, 18(2), 149–171. [https://doi.org/10.1016/0166-5316\(93\)90035-S](https://doi.org/10.1016/0166-5316(93)90035-S)
- Fiske, I., & Chandler, R. (2011). Unmarked: An R Package for Fitting Hierarchical Models of Wildlife Occurrence and Abundance. *Journal of Statistical Software*, 43, 1–23. <https://doi.org/10.18637/jss.v043.i10>
- Gilbert, N. A., Clare, J. D. J., Stenglein, J. L., & Zuckerman, B. (2021). Abundance estimation of unmarked animals based on camera-trap data. *Conservation Biology: The Journal of the Society for Conservation Biology*, 35(1), 88–100. <https://doi.org/10.1111/cobi.13517>
- Gimenez, O., Kervellec, M., Fanjul, J.-B., Chaine, A., Marescot, L., Bollet, Y., & Duchamp, C. (2022). Trade-off between deep learning for species identification and inference about predator-prey co-occurrence. *Computo*. <https://doi.org/10.57750/yfm2-5f45>
- Gonzalez, A., Vihervaara, P., Balvanera, P., Bates, A. E., Bayraktarov, E., Bellingham, P. J., Bruder, A., Campbell, J., Catchen, M. D., Cavender-Bares, J., Chase, J., Coops, N., Costello, M. J., Dornelas, M., Dubois, G., Duffy, E. J., Eggermont, H., Fernandez, N., Ferrier, S., ... Wright, E. (2023). A global biodiversity observing system to unite monitoring and guide action. *Nature Ecology & Evolution*, 1–5. <https://doi.org/10.1038/s41559-023-02171-0>
- Guillera-Arroita, G. (2012). *Occupancy modelling : Study design and models for data collected along transects* (Doctoral dissertation). University of Kent. <https://doi.org/10.22024/UniKent/01.02.86472>
- Guillera-Arroita, G. (2017). Modelling of species distributions, range dynamics and communities under imperfect detection: Advances, challenges and opportunities. *Ecography*, 40(2), 281–295. <https://doi.org/10.1111/ecog.02445>
- Guillera-Arroita, G., Morgan, B. J. T., Ridout, M. S., & Linkie, M. (2011). Species Occupancy Modeling for Detection Data Collected Along a Transect. *Journal of Agricultural, Biological, and Environmental Statistics*, 16(3), 301–317. <https://doi.org/10.1007/s13253-010-0053-3>
- Haines, L. M., Altwegg, R., & Borchers, D. L. (2023). Exact likelihoods for N-mixture models with time-to-detection data. *Australian & New Zealand Journal of Statistics*, n/a(n/a). <https://doi.org/10.1111/anzs.12401>
- Halstead, B. J., Rose, J. P., & Kleeman, P. M. (2021). Time-to-detection occupancy methods: Performance and utility for improving efficiency of surveys. *Ecological Applications*, 31(3), e2267. <https://doi.org/10.1002/eap.2267>
- Hawkes, A. G. (1971). Spectra of some self-exciting and mutually exciting point processes. *Biometrika*, 58(1), 83–90. <https://doi.org/10.1093/biomet/58.1.83>

- Henry, D. A. W., Lee, A. T. K., & Altwegg, R. (2020). Can time-to-detection models with fewer survey replicates provide a robust alternative to traditional site-occupancy models? *Methods in Ecology and Evolution*, 11(5), 643–655. <https://doi.org/10.1111/2041-210X.13379>
- Høye, T. T., Groom, Q., Juslén, A., Mandon, C., Dinesen, L., Rosenberg, A., Hendriks, R. J., Eggermont, H., & Vihervaara, P. (2022). *Biodiversity monitoring knowledge gaps and research & innovation priorities* (tech. rep. Biodiversa+ D2.1).
- Hsing, P.-Y. (2019). *Monitoring the UK's wild mammals: A new grammar for citizen science engagement and ecology* (Doctoral dissertation). Durham University.
- IPBES. (2019). *Global assessment report on biodiversity and ecosystem services of the Intergovernmental Science-Policy Platform on Biodiversity and Ecosystem Services* (tech. rep.). Zenodo. <https://doi.org/10.5281/zenodo.6417333>
- IUCN. (2021). *Nature 2030 : One nature, one future : A programme for the Union 2021-2024* (tech. rep.). IUCN.
- Kays, R., Arbogast, B. S., Baker-Whitton, M., Beirne, C., Boone, H. M., Bowler, M., Burneo, S. F., Cove, M. V., Ding, P., Espinosa, S., Gonçalves, A. L. S., Hansen, C. P., Jansen, P. A., Kolowski, J. M., Knowles, T. W., Lima, M. G. M., Millspaugh, J., McShea, W. J., Pacifici, K., ... Spironello, W. R. (2020). An empirical evaluation of camera trap study design: How many, how long and when? *Methods in Ecology and Evolution*, 11(6), 700–713. <https://doi.org/10.1111/2041-210X.13370>
- Kellner, K. F., Parsons, A. W., Kays, R., Millspaugh, J. J., & Rota, C. T. (2022). A Two-Species Occupancy Model with a Continuous-Time Detection Process Reveals Spatial and Temporal Interactions. *Journal of Agricultural, Biological and Environmental Statistics*, 27(2), 321–338. <https://doi.org/10.1007/s13253-021-00482-y>
- Kellner, K. F., Smith, A. D., Royle, J. A., Kéry, M., Belant, J. L., & Chandler, R. B. (2023). The unmarked R package: Twelve years of advances in occurrence and abundance modelling in ecology. *Methods in Ecology and Evolution*, n/a(n/a). <https://doi.org/10.1111/2041-210X.14123>
- Kellner, K. F., & Swihart, R. K. (2014). Accounting for Imperfect Detection in Ecology: A Quantitative Review. *PLOS ONE*, 9(10), e111436. <https://doi.org/10.1371/journal.pone.0111436>
- Kéry, M., & Schmidt, B. (2008). Imperfect detection and its consequences for monitoring for conservation. *Community Ecology*, 9(2), 207–216. <https://doi.org/10.1556/comec.9.2008.2.10>
- Lahoz-Monfort, J. J., & Magrath, M. J. L. (2021). A Comprehensive Overview of Technologies for Species and Habitat Monitoring and Conservation. *BioScience*, 71(10), 1038–1062. <https://doi.org/10.1093/biosci/biab073>
- Le Borgne, H., & Bouget, C. (2023). Suivis de biodiversité par la reconnaissance automatique des espèces sur photographies : Perspectives et défis. *Naturae*, (6). <https://doi.org/10.5852/naturae2023a6>
- Liemohn, M. W., Shane, A. D., Azari, A. R., Petersen, A. K., Swiger, B. M., & Mukhopadhyay, A. (2021). RMSE is not enough: Guidelines to robust data-model comparisons for magnetospheric physics. *Journal of Atmospheric and Solar-Terrestrial Physics*, 218, 105624. <https://doi.org/10.1016/j.jastp.2021.105624>

- MacKenzie, D. I., Nichols, J. D., Lachman, G. B., Droege, S., Andrew Royle, J., & Langtimm, C. A. (2002). Estimating Site Occupancy Rates When Detection Probabilities Are Less Than One. *Ecology*, 83(8), 2248–2255. <https://doi.org/10.2307/3072056>
- MacKenzie, D. I., Royle, J. A., Brown, J. A., & Nichols, J. D. (2004). Occupancy Estimation and Modeling for Rare and Elusive Populations. *Sampling Rare or Elusive Species: Concepts, Designs, and Techniques for Estimating Population Parameters* (pp. 149–172). Island Press.
- Moore, H. A., Champney, J. L., Dunlop, J. A., Valentine, L. E., Nimmo, D. G., Moore, H. A., Champney, J. L., Dunlop, J. A., Valentine, L. E., & Nimmo, D. G. (2020). Spot on: Using camera traps to individually monitor one of the world's largest lizards. *Wildlife Research*, 47(4), 326–337. <https://doi.org/10.1071/WR19159>
- Neilson, E. W., Avgar, T., Burton, A. C., Broadley, K., & Boutin, S. (2018). Animal movement affects interpretation of occupancy models from camera-trap surveys of unmarked animals. *Ecosphere*, 9(1), e02092. <https://doi.org/10.1002/ecs2.2092>
- Oliver, R. Y., Iannarilli, E., Ahumada, J., Fegraus, E., Flores, N., Kays, R., Birch, T., Ranipeta, A., Rogan, M. S., Sica, Y. V., & Jetz, W. (2023). Camera trapping expands the view into global biodiversity and its change. *Philosophical Transactions of the Royal Society B: Biological Sciences*, 378(1881), 20220232. <https://doi.org/10.1098/rstb.2022.0232>
- Pollock, L. J., Tingley, R., Morris, W. K., Golding, N., O'Hara, R. B., Parris, K. M., Vesk, P. A., & McCarthy, M. A. (2014). Understanding co-occurrence by modelling species simultaneously with a Joint Species Distribution Model (JSDM). *Methods in Ecology and Evolution*, 5(5), 397–406. <https://doi.org/10.1111/2041-210X.12180>
- Potamitis, I., Ntalampiras, S., Jahn, O., & Riede, K. (2014). Automatic bird sound detection in long real-field recordings: Applications and tools. *Applied Acoustics*, 80, 1–9. <https://doi.org/10.1016/j.apacoust.2014.01.001>
- Priyadarshani, D., Altwegg, R., Lee, A. T. K., & Hwang, W.-H. (2022). What can occupancy models gain from time-to-detection data? *Ecology*, n/a(n/a), e3832. <https://doi.org/10.1002/ecy.3832>
- Priyadarshani, D., Huynh, H.-D., Altwegg, R., & Hwang, W.-H. (2024). A unified framework for time-to-detection occupancy and abundance models. *Methods in Ecology and Evolution*, n/a(n/a). <https://doi.org/10.1111/2041-210X.14296>
- Punt, A. E., Butterworth, D. S., De Moor, C. L., De Oliveira, J. A. A., & Haddon, M. (2016). Management strategy evaluation: Best practices. *Fish and Fisheries*, 17(2), 303–334. <https://doi.org/10.1111/faf.12104>
- R Core Team. (2023). *R: A language and environment for statistical computing*. Manual. R Foundation for Statistical Computing. Vienna, Austria.
- Rhinehart, T. A., Turek, D., & Kitzes, J. (2022). A continuous-score occupancy model that incorporates uncertain machine learning output from autonomous biodiversity surveys. *Methods in Ecology and Evolution*, 13(8), 1778–1789. <https://doi.org/10.1111/2041-210X.13905>

- Rodríguez, J. P., Keith, D. A., Rodríguez-Clark, K. M., Murray, N. J., Nicholson, E., Regan, T. J., Miller, R. M., Barrow, E. G., Bland, L. M., Boe, K., Brooks, T. M., Oliveira-Miranda, M. A., Spalding, M., & Wit, P. (2015). A practical guide to the application of the IUCN Red List of Ecosystems criteria. *Philosophical Transactions of the Royal Society B: Biological Sciences*, 370(1662), 20140003. <https://doi.org/10.1098/rstb.2014.0003>
- Royle, J. A., & Nichols, J. D. (2003). Estimating Abundance from Repeated Presence–Absence Data or Point Counts. *Ecology*, 84(3), 777–790. [https://doi.org/10.1890/0012-9658\(2003\)084\[0777:EAFRPA\]2.0.CO;2](https://doi.org/10.1890/0012-9658(2003)084[0777:EAFRPA]2.0.CO;2)
- Rushing, C. S. (2023). An ecologist’s introduction to continuous-time multi-state models for capture-recapture data. *Journal of Animal Ecology*, n/a(n/a). <https://doi.org/10.1111/1365-2656.13902>
- Rydén, T. (1994). Parameter estimation for Markov modulated poisson processes. *Communications in Statistics. Stochastic Models*, 10(4), 795–829. <https://doi.org/10.1080/15326349408807323>
- Schofield, M. R., Barker, R. J., & Gelling, N. (2018). Continuous-time capture–recapture in closed populations. *Biometrics*, 74(2), 626–635. <https://doi.org/10.1111/biom.12763>
- Skaug, H. J. (2006). Markov Modulated Poisson Processes for Clustered Line Transect Data. *Environmental and Ecological Statistics*, 13(2), 199–211. <https://doi.org/10.1007/s10651-005-0006-0>
- Steenweg, R., Hebblewhite, M., Kays, R., Ahumada, J., Fisher, J. T., Burton, C., Townsend, S. E., Carbone, C., Rowcliffe, J. M., Whittington, J., Brodie, J., Royle, J. A., Switalski, A., Clevenger, A. P., Heim, N., & Rich, L. N. (2017). Scaling-up camera traps: Monitoring the planet’s biodiversity with networks of remote sensors. *Frontiers in Ecology and the Environment*, 15(1), 26–34. <https://doi.org/10.1002/fee.1448>
- Tuia, D., Kellenberger, B., Beery, S., Costelloe, B. R., Zuffi, S., Risse, B., Mathis, A., Mathis, M. W., van Langevelde, F., Burghardt, T., Kays, R., Klinck, H., Wikelski, M., Couzin, I. D., van Horn, G., Crofoot, M. C., Stewart, C. V., & Berger-Wolf, T. (2022). Perspectives in machine learning for wildlife conservation. *Nature Communications*, 13(1), 792. <https://doi.org/10.1038/s41467-022-27980-y>
- UNECE. (2023). *Guidelines for Developing National Biodiversity Monitoring Systems*. United Nations. <https://doi.org/10.18356/9789210024006>
- van Strien, A. J., van Swaay, C. A., & Termaat, T. (2013). Opportunistic citizen science data of animal species produce reliable estimates of distribution trends if analysed with occupancy models. *Journal of Applied Ecology*, 50(6), 1450–1458. <https://doi.org/10.1111/1365-2664.12158>
- Vihervaara, P., Lipsanen, A., Suni, T., Mandon, C., Eggermont, H., Body, G., Basille, M., Naeslund, M., Silva Del Pozo, M., Basset, A., Onen Tarantini, S., Dinesen, L., Hoye, T., Hendriks, R., Heck, A., Eichenberg, D., McCallum, I., Liqueste, C., Maes, J., ... Borg, J. (2023). *Biodiversa+ strategic biodiversity monitoring governance document (Phase 1)* (tech. rep. Biodiversa+ D2.8).
- Wägele, J. W., Bodesheim, P., Bourlat, S. J., Denzler, J., Diepenbroek, M., Fonseca, V., Frommolt, K.-H., Geiger, M. F., Gemeinholzer, B., Glöckner, F. O., Haucke, T., Kirse, A., Kölpin, A., Kostadinov, I., Köhl, H. S., Kurth, F., Lasseck, M., Liedke, S., Losch, F., ... Wildermann, S. (2022). Towards a multisensor station for automated biodiversity monitoring. *Basic and Applied Ecology*, 59, 105–138. <https://doi.org/10.1016/j.baae.2022.01.003>

- Zhang, W., & Bonner, S. J. (2020). On continuous-time capture-recapture in closed populations. *Biometrics*, 76(3), 1028–1033. <https://doi.org/10.1111/biom.13185>
- Zwerts, J. A., Stephenson, P. J., Maisels, F., Rowcliffe, M., Astaras, C., Jansen, P. A., van der Waarde, J., Sterck, L. E. H. M., Verweij, P. A., Bruce, T., Brittain, S., & van Kuijk, M. (2021). Methods for wildlife monitoring in tropical forests: Comparing human observations, camera traps, and passive acoustic sensors. *Conservation Science and Practice*, 3(12), e568. <https://doi.org/10.1111/csp2.568>
