1 Analysing biodiversity observation data collected in continuous time:  
2 Should we use discrete or continuous-time occupancy models?

3 Léa Pautrel<sup>1,2,\*</sup>, Sylvain Moulherat<sup>1</sup>, Olivier Gimenez<sup>2</sup>, and Marie-Pierre Etienne<sup>3</sup>

4 <sup>1</sup>OïkoLab, TerrOïko, 2 Place Dom Devic, 81540 Sorèze, France

5 <sup>2</sup>CEFE, University of Montpellier, CNRS, EPHE, IRD, 1919 route de Mende, 34090 Montpellier, France

6 <sup>3</sup>IRMAR, Rennes University, Institut Agro Rennes Angers, 65 route de Saint Briec, 35042 Rennes,  
7 France

8 \* Corresponding author: [lea.pautrel@terroiko.fr](mailto:lea.pautrel@terroiko.fr)

## 9 **Abstract**

10 **1.** Biodiversity monitoring is undergoing a revolution, with fauna observations data being increasingly  
11 gathered continuously over extended periods, through sensors like camera traps and acoustic recorders, or via  
12 opportunistic observations. These data are often analysed with discrete-time ecological models, requiring the  
13 transformation of continuously collected data into arbitrarily chosen non-independent discrete time intervals.  
14 To overcome this issue, ecologists are increasingly turning to the existing continuous-time models in the  
15 literature. Closer to the real detection process, they are lesser known than discrete-time models, not always  
16 easily accessible, and can be more complex. Focusing on occupancy models, a type of species distribution  
17 models, we asked ourselves: Should we dedicate time and effort to learning and using these continuous-time  
18 models, or can we go on using discrete-time models?

19 **2.** We conducted a comparative simulation study using data generated within a continuous-time framework,  
20 aiming to closely mirror real-world conditions. We assessed the performance of five occupancy models: a  
21 standard simple detection/non detection model, a model based on count data, a continuous-time Poisson  
22 process, and two types of modulated Poisson processes. Our goal was to assess their respective abilities to  
23 estimate occupancy probability with continuously collected data.

24 **3.** We found that, in most scenarios, both discrete and continuous models performed similarly, accurately  
25 estimating occupancy probability. Additionally, variation in discretisation intervals had minimal impact on the  
26 discrete models' capacity to estimate occupancy accurately.

27 **4.** Our study underscores that when the sole aim is to accurately estimate occupancy, opting for complex  
28 continuous models, with an increased number of parameters aiming to closely mimic ecological conditions,  
29 may not offer substantial advantages over simpler models. Therefore, choosing between continuous and  
30 discrete occupancy models should be driven by practical considerations such as data availability or  
31 implementation time, and the specific study objectives. For example modulated Poisson processes may be  
32 useful to better understand temporal variations in detection, which may reflect specific species behaviour. We  
33 hope that our findings offer valuable guidance for researchers and practitioners working with continuously  
34 collected data in wildlife monitoring and modelling.

35 **Keywords** Camera trap, Continuous-time model, Discrete-time model, Markov Modulated Poisson Process,  
36 Occupancy modelling, Poisson Process, Sensors, Wildlife monitoring

## 37 **1 Introduction**

38 The alarming decline of biodiversity has led to a scientific, ethical, and legal need to better understand its  
39 drivers in order to protect nature more effectively (IPBES, 2019). With the reinforcement of regulations and  
40 recommendations for achieving the objectives of no net loss of biodiversity, the need for wildlife monitoring is  
41 growing rapidly (UNECE, 2023). Concurrently, the development of increasingly sophisticated and accessible  
42 technologies is leading to a digital revolution. Sensors, such as camera traps or autonomous recording units,  
43 are now available to address current ecological challenges (Burton et al., 2015; Potamitis et al., 2014).

44 Sensors offer many advantages compared to traditional field observations by naturalists. They are  
45 non-invasive, often cost-effective, particularly adapted to observe some elusive or shy species, potentially in  
46 challenging terrain, and they can improve reproducibility and protocol standardisation (Steenweg et al., 2017;  
47 Zwerts et al., 2021). Sensors are therefore good candidates for setting up large-scale monitoring (Oliver et al.,  
48 2023) and collaborations such as Biodiversity Observation Networks (Gonzalez et al., 2023). Policies now  
49 emphasise the use of sensors, big data and artificial intelligence to improve knowledge and understanding of  
50 species and ecosystems, such as the International Union for Conservation of Nature (IUCN) Nature 2030  
51 programme (IUCN, 2021) or the Biodiversa+ European Biodiversity Partnership (Høye et al., 2022; Vihervaara  
52 et al., 2023).

53 We often use ecological models to analyse observation data for monitoring purposes. These models typically  
54 assess the presence (Guillera-Arroita, 2016) or abundance (Gilbert et al., 2021) of a species, often while  
55 considering the relation with environmental factors. They can be used for a particular species or within a  
56 multi-species framework (Pollock et al., 2014). These models produce actionable knowledge about species,  
57 influencing our actions and our approach to biodiversity conservation. For example, the area of occupancy,  
58 *i.e.* the spatial distribution where a species is present, is one of the criterion used by the IUCN to establish the  
59 Red list of Ecosystems (Rodríguez et al., 2015).

60 In this paper, we focus on occupancy models, a category of ecological models aiming to estimate species  
61 presence. Occupancy models, as introduced by MacKenzie et al. (2002), are hierarchical models that include  
62 two sub-models. The first sub-model describes the ecological process, occupancy, typically of interest to  
63 ecologists. The second sub-model accounts for measurement errors arising from imperfect detection. A site is  
64 said occupied when at least one individual went through it (Emmet et al., 2021). At a broader scale, occupancy  
65 corresponds to the proportion of sites within a study area that are occupied by the species (MacKenzie et al.,  
66 2002). The occupancy model proposed by MacKenzie et al. (2002) uses binary data (0 if the species was not  
67 detected, 1 if it was) at each site during each sampling occasion. This model has underpinned numerous  
68 occupancy studies in the last two decades, and was refined or adapted by many modellers (Bailey et al., 2014).  
69 These adaptations have given rise to new occupancy models, most of them aiming to mirror more closely the  
70 expected ecological or detection conditions, impacting the input data required by each model.

71 Ecological models, including occupancy models, have historically been developed to analyse observation data

72 collected by field operators during one or several short sampling occasions (Bailey et al., 2014). However, the  
73 deployment of sensors involves continuous data collection, often over long time periods (*e.g.* Cove et al., 2021;  
74 Cusack et al., 2015; Moore et al., 2020). For instance, Kays et al. (2020) recommend deploying sensors for three  
75 to five weeks at multiple locations to estimate relative abundance, occupancy, or species richness. Short-term  
76 deployments can equate traditional discrete sampling occasions. However, when sensors are stationed at the  
77 same location for extended periods, data is often discretised in order to use traditional models in discrete time.  
78 We suggest using the term **session** for these discretised time intervals, because they differ from traditional  
79 sampling occasions in two respects: (1) sampling occasions are determined before the data collection,  
80 whereas the discretisation is done after the data has been collected; and (2) sessions occur consecutively  
81 without any gaps between them, while the traditional sampling occasions are separated by periods of time  
82 when the site is not monitored.

83 Occupancy discrete-time models have been around for 20 years and are commonly used because they are  
84 relatively simple to implement. However, continuous-time ecological modelling is not new. The first mention  
85 of a continuous-time model in the capture-recapture literature dates back to Becker (1984). It was not until the  
86 advent of sensors, which highlighted the limitations of discrete-time models, that modellers began to turn  
87 towards continuous-time models (Kellner et al., 2022; Rushing, 2023; Schofield et al., 2017). Nonetheless,  
88 continuous-time models are not a universal cure-all. Each family of models have their pros and cons.

89 **Discretisation simplifies the information.** Discretisation is, in other words, an aggregation of data into  
90 sessions. This aggregation simplifies the data and blurs the residual variability, which can help in interpreting  
91 broad observed trends. However, simplification is also information loss. It can obscure fine patterns that may  
92 have ecological significance and enhance our understanding of the species (Kellner et al., 2022). Such patterns  
93 could provide insights into the disentanglement of the observation process from the ecological process of  
94 interest, leading to improved models and more accurate estimations.

95 **Discretisation is arbitrary.** Researchers usually choose the aggregation period so that the detection  
96 probability is not too low, and the occupancy probability is not estimated at its boundaries (close to 0 or 1).  
97 Schofield et al. (2017) highlighted that the chosen session length can impact the models results for  
98 capture-recapture. Hence, it most likely impacts occupancy models outputs, as capture-recapture and  
99 occupancy models are very similar (the individual capture history equates the site "detection history",  
100 MacKenzie et al., 2002). Eliminating arbitrary discretisation in occupancy modelling can enhance the method  
101 objectivity and reproducibility, and is expected to improve result reliability, at least compared to a non-optimal  
102 discretisation.

103 **Model complexity and data availability.** Although models with a continuous-time detection process are  
104 likely to overcome the limitations mentioned above, they can swiftly become intricate if researchers strive to  
105 mirror the species-specific ecological observation process. Complex models entail a large number of

106 parameters, requiring large data sets for parameter estimation. However, due to the common scarcity of  
107 ecological data, such complexity might impede rather than enhance the model's ability to derive essential  
108 ecological insights. Additionally, if the system is not assumed to be constant over time, continuous-time  
109 covariates are necessary for a continuous-time model, and these covariates are often not readily available.  
110 Zhang and Bonner (2019) showed that it was not necessarily the discretisation that impacted the results, but  
111 rather the distribution law chosen for modelling the detection process. When dealing with mathematically  
112 equivalent models, both continuous- and discrete-time models would yield equivalent outcomes. Thus, the  
113 preference for one over the other becomes less significant. Opting for a continuous-time model would likely  
114 be worthwhile only for exploring intricate temporal variations within the data, which is not the typical goal of  
115 most studies.

116 In an operational context, users select an occupancy model depending on a trade-off between model  
117 performance and implementation cost. This cost encompasses factors such as model familiarity,  
118 programming if necessary, and accessibility to data, all of which can be influenced by the complexity of the  
119 model. Existing comparisons between discrete and continuous models are presented in papers introducing  
120 new continuous models, focusing on evaluating the new model formulation, and often limited to just two  
121 models. In this paper, we investigate whether continuous-time modelling is beneficial for occupancy  
122 estimation using sensor-based observation data and under which circumstances.

123 We conduct a comprehensive comparison of five occupancy models, varying in the complexity of their  
124 detection processes. These five models cover the full scope of single-species static occupancy models with no  
125 false positives (MacKenzie et al., 2013). We compare the ability of occupancy models to retrieve occupancy  
126 probability using four complementary comparison metrics: bias, error, coverage, and the width of confidence  
127 intervals. To fully control the environment, we simulate continuous detection data. This allows us to explore  
128 how the rarity and elusiveness of the target species influences the model's ability to retrieve the occupancy. We  
129 also simulate extreme cases to refine the models' application limits. Our aim is to offer recommendations for  
130 choosing discrete- or continuous-time models based on the study objectives, and to discuss various  
131 considerations that researchers should address when analysing fauna observation data collected through  
132 sensors.

## 133 **2 Material and methods**

### 134 **2.1 Occupancy models**

135 In this section, we describe the five hierarchical occupancy models compared, with an ecological process  
136 modelling presence or occupancy, and an observation process addressing imperfect detection. The occupancy  
137 sub-model is consistent across all five models, while the observation sub-model differs. Fig. 1 provides a  
138 overview of the formulation and input data of the considered models, which are described in detail in the  
139 following paragraphs. The mathematical notation are listed in Table 1.

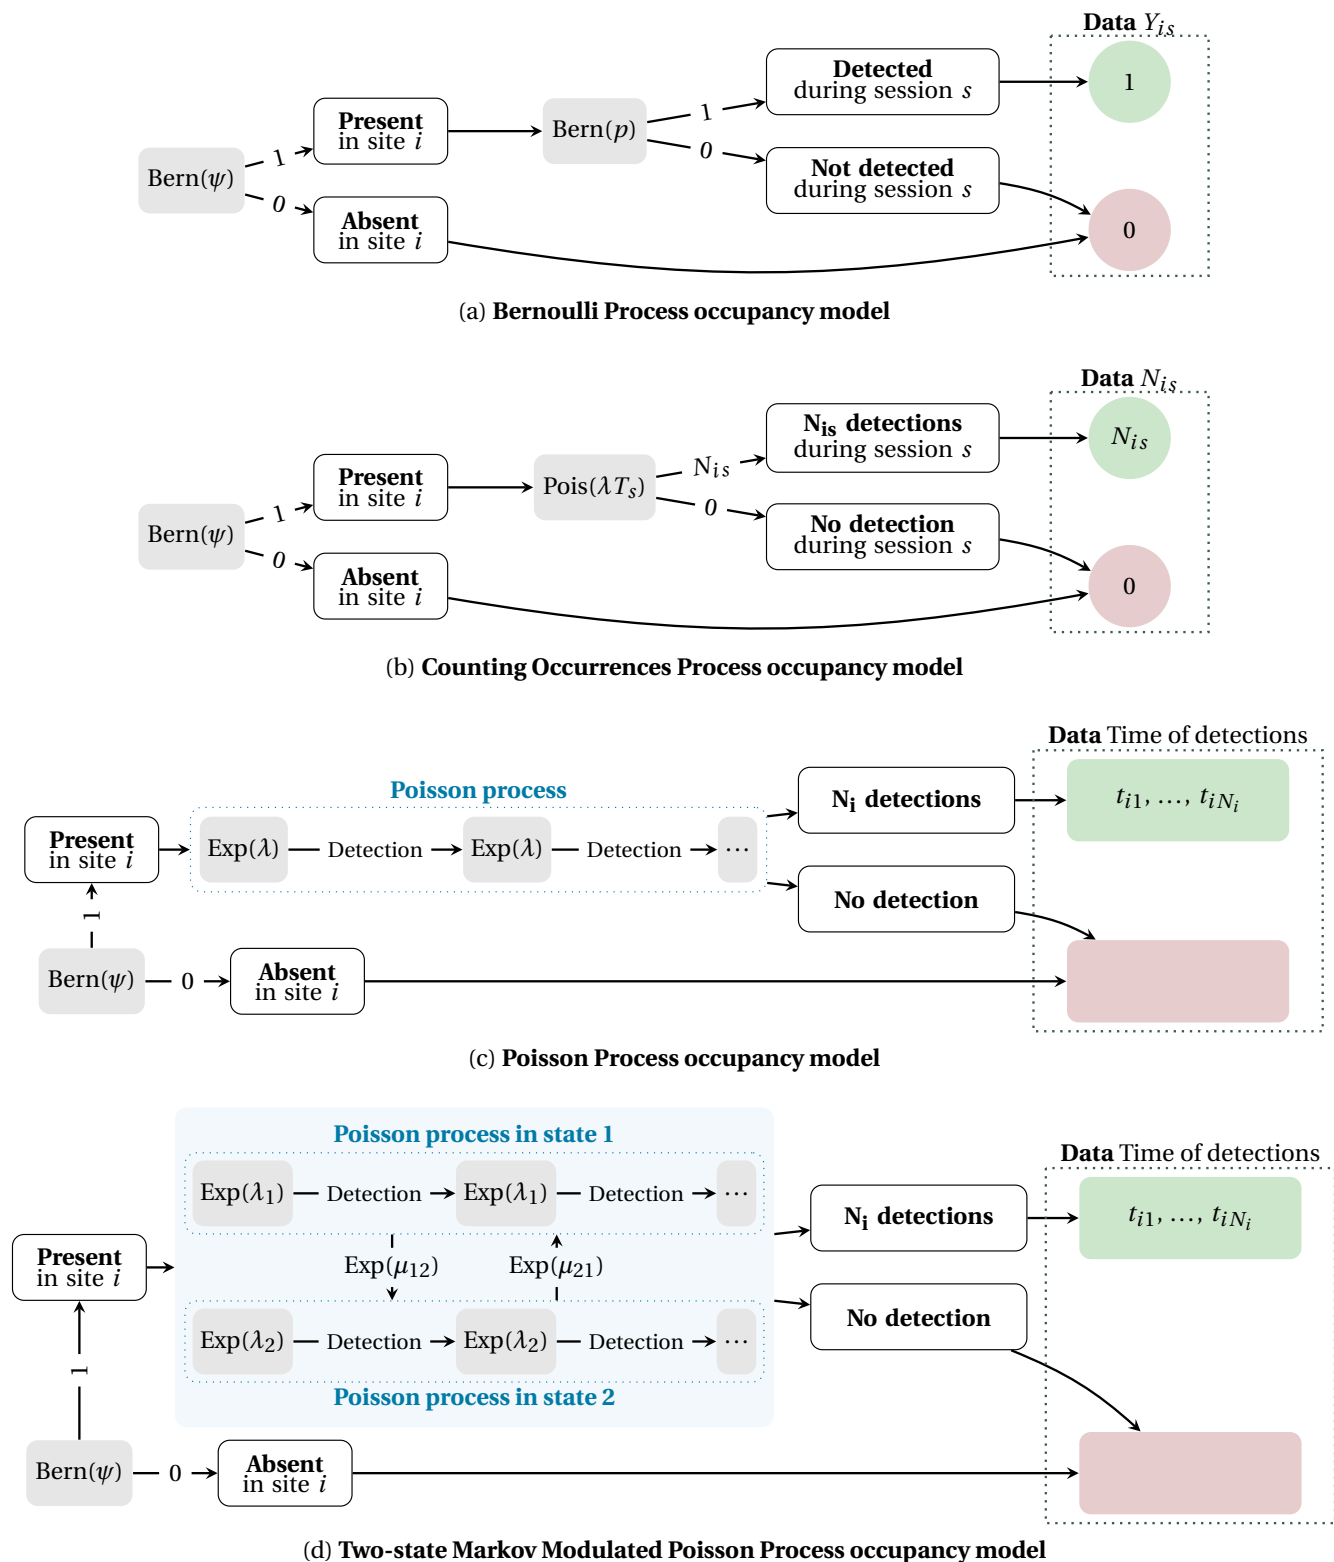

**Figure 1: Five occupancy models compared.** With:  $\psi$  the occupancy probability; (a) **BP**  $p$  the detection probability;  $Y_{is}$  the detection/non detection observed in site  $i$  during session  $s$ ; (b) **COP**  $\lambda$  the detection rate;  $T_s$  the duration of a session;  $N_{is}$  the number of detections in site  $i$  during session  $s$ ; (c) **PP**  $\lambda$  the detection rate;  $N_i$  the number of detections in site  $i$ ;  $t_{ik}$  the time of the  $k^{\text{th}}$  detection in site  $i$ ; (d) **2-MMPP**  $\lambda_1$  the detection rate in state 1;  $\lambda_2$  the detection rate in state 2;  $\mu_{12}$  the switching rate from state 1 to state 2;  $\mu_{21}$  the switching rate from state 2 to state 1;  $N_i$  the number of detections in site  $i$ ;  $t_{ik}$  the time of the  $k^{\text{th}}$  detection in site  $i$ . **IPP** is a special case of 2-MMPP with no detection in one state.

Table 1: **Notation.**

|                                                                                 |                                                                                    |
|---------------------------------------------------------------------------------|------------------------------------------------------------------------------------|
| $I$                                                                             | Number of sites                                                                    |
| $\psi$                                                                          | Occupancy probability                                                              |
| $Z_i$                                                                           | Occupancy state of site $i$ (present = 1, absent = 0)                              |
| $T_i$                                                                           | Deployment's duration in site $i$                                                  |
| $N_{it}$                                                                        | Number of detections of the species in site $i$ during $t$                         |
| $p_t$                                                                           | Probability of detecting at least one individual during $t$                        |
| $n_{sim}$                                                                       | Number of simulations per scenario                                                 |
| <b>Discrete time occupancy models</b>                                           |                                                                                    |
| $T_s$                                                                           | Duration of a discretised session                                                  |
| $S$                                                                             | Number of sessions during $T_i$                                                    |
| <i>Bernoulli Process</i>                                                        |                                                                                    |
| $Y_{is}$                                                                        | Species detected in site $i$ during session $s$ (detection = 1, non-detection = 0) |
| $p$                                                                             | Probability of detecting at least one individual during $T_s$                      |
| <i>Counting Occurrences Process</i>                                             |                                                                                    |
| $N_{is}$                                                                        | Number of detections of the species in site $i$ during session $s$                 |
| $\lambda$                                                                       | Detection rate                                                                     |
| <b>Continuous-time occupancy models</b>                                         |                                                                                    |
| $t_{ij}$                                                                        | Time of the $j^{\text{th}}$ detection in site $i$                                  |
| <i>Poisson Process</i>                                                          |                                                                                    |
| $\lambda$                                                                       | Detection rate                                                                     |
| <i>Two-state Markov Modulated Poisson Process ; Interrupted Poisson Process</i> |                                                                                    |
| $\lambda_1$                                                                     | Detection rate in state 1, with $\lambda_1 = 0$ for the IPP model                  |
| $\lambda_2$                                                                     | Detection rate in state 2                                                          |
| $\mu_{12}$                                                                      | Switching rate from state 1 to state 2                                             |
| $\mu_{21}$                                                                      | Switching rate from state 2 to state 1                                             |
| $\pi_1$                                                                         | Time-ratio spent in state 1 when the system is stationary                          |
| $\pi_2$                                                                         | Time-ratio spent in state 2 when the system is stationary                          |

### 140 2.1.1 Occupancy sub-model

141 All five models relate on a site-specific latent variable, the occupancy state of the site  $i$ ,  $Z_i$ , which is assumed to  
142 follow a Bernoulli distribution with parameter  $\psi$ , the occupancy probability. The sites are assumed  
143 independent, regarding both occupancy and detection.

$$Z_i \stackrel{i.i.d.}{\sim} \text{Bernoulli}(\psi), \quad i = 1, \dots, I. \quad (1)$$

144 If the species is detected at least once in a site, that site is considered occupied, with no room for false  
145 detections. Temporal changes in occupancy are not considered; for simplicity, we focus on single-season  
146 occupancy models with no covariates.

### 147 2.1.2 Detection sub-model

148 Two models rely on the time discretisation of the sensor-based observation data (**Bernoulli Process (BP)** and  
149 **Counting Occurrences Process (COP)**), while three others consider the detection as the realisation of a  
150 continuous-time stochastic process (**Poisson Process (PP)**, **Two-state Markov Modulated Poisson Process**  
151 **(2-MMPP)** and **Interrupted Poisson Process (IPP)**). Their growing complexity, associated with an expected  
152 closer alignment with reality, influences the input data required for each model. Our primary focus is to  
153 determine if more complex representations of the detection process lead to improved estimates of occupancy  
154 probability, with minimised error and bias.

155 **Bernoulli Process (BP)** In the classical occupancy model proposed by MacKenzie et al. (2002), the raw data  
156 are aggregated and simplified. The continuous data are aggregated into  $S$  sessions of duration  $T_s$ , and simplified  
157 into the observation  $Y_{is}$ , which is 1 if at least one detection occurs during session  $s$  at site  $i$ , and 0 otherwise.  
158 Conditionally on the occupancy state  $Z_i$  of site  $i$ , the model assumes that the distribution of the variable of  
159 interest  $Y$  depends on  $p$  the probability of detecting at least one individual during a session:

$$\begin{cases} Y_{is}|Z_i = 1 & \stackrel{i.i.d.}{\sim} \text{Bernoulli}(p), \quad i = 1, \dots, I, \quad s = 1, \dots, S, \\ Y_{is}|Z_i = 0 & \stackrel{i.i.d.}{\sim} 0 \end{cases} \quad (2)$$

160 **Counting Occurrences Process (COP)** In the BP model, detecting few or many individuals during a session  
161 leads to the same observation  $Y_{is} = 1$ , although it corresponds to very different situations. We simplified the  
162 approach proposed by Emmet et al. (2021) to avoid references to secondary sessions and to use probability. As  
163 a result, its likelihood has been adjusted and is provided in supplementary information.

164 Although the data is aggregated by session like in the BP model, more information is retained since this  
165 approach models  $N_{is}$ , the number of individuals seen at site  $i$  during session  $s$ . Conditionally on the  
166 occupancy state  $Z_i$  of site  $i$ , as it is typical for count data, the COP model assumes that the number of



167 detections  $N_{i_s}$  follows a Poisson distribution of parameter  $\lambda$  the detection rate multiplied by  $T_s$  the session  
168 duration:

$$\begin{cases} N_{i_s}|Z_i = 1 & \overset{i.i.d}{\sim} \text{Poisson}(\lambda T_s), \quad i = 1, \dots, I, s = 1, \dots, S, \\ N_{i_s}|Z_i = 0 & \overset{i.i.d}{\sim} 0 \end{cases} \quad (3)$$

169 In practical terms, if the time-unit is a day, then when the detection rate  $\lambda = 3$ , there are on average three  
170 individuals detected by day. If each session lasts a week,  $T_s = 7$ , then there are on average  $\lambda T_s = 3 \times 7 = 21$   
171 individuals detected per session. The probability of detecting  $k$  individuals during a session is  $(\lambda T_s)^k e^{-\lambda T_s} / k!$ .  
172 With this example, in an occupied site during a session, there is a 8.67% chance of detecting 21 individuals, a  
173 0.35% chance for 10 individuals, and a 7.58e<sup>-8</sup>% chance of detecting nothing.

174 **Poisson Process (PP)** Unlike the two previous models which required data discretisation, the PP occupancy  
175 model proposed by Guillera-Arroita et al. (2011) uses the time of detections as data, with  $t_{ij}$  the time of the  $j^{\text{th}}$   
176 detection in site  $i$ . These raw, unaggregated data retain all of its information. The time of detections are  
177 transformed into interdetection times to calculate the likelihood of these data given the model and its  
178 parameters. The first interdetection time is usually defined as the time between the deployment beginning  
179 and the first detection, the second as the time between the first detection and the second, and so forth. The  
180 last value in this vector can be defined as the time between the last detection and the end of deployment. If the  
181 time at which the deployment ended is not known, *e.g.* because the battery died, the likelihood can be adapted  
182 so that this last value can be the time between the second-to-last detection and the last detection  
183 (Guillera-Arroita et al., 2011).

184 When the site  $i$  is occupied, the detection process is modeled as a homogeneous Poisson point process of  
185 parameter  $\lambda$ , the detection rate. This means that the interdetection times are exponential variables with rate  $\lambda$ .  
186 In practical terms, if the time-unit is a day, then a detection rate  $\lambda = 3$  means that on average, three individuals  
187 are seen per day. The average time between two detections is  $1/3$  of a day.

188 One property of a Poisson process of parameter  $\lambda$  is that the number of detections over a period of time  $T$   
189 follows a Poisson distribution with parameter  $\lambda T$ . This model is therefore mathematically equivalent to the  
190 COP model presented above (Zhang & Bonner, 2019). Nonetheless, using the raw data could enable ecologists  
191 to delve deeper and consider the detection rate heterogeneity with the model residuals.

192 **Two-state Markov Modulated Poisson Process (2-MMPP)** The 2-MMPP occupancy model was also proposed  
193 by Guillera-Arroita et al. (2011) and uses the time of detection events as data, transformed into interdetection  
194 times. When the site  $i$  is occupied, the detection process is modeled as a system of Poisson processes with  
195 two different rates. When the system is in state 1, the detection events are modeled by a Poisson process of  
196 parameter  $\lambda_1$ . In state 2, the rate is  $\lambda_2$ . This is a two-state Markov chain, where the system switches from one

197 hidden state to the other, with parameters  $\mu_{12}$  (switching rate from state 1 to state 2) and  $\mu_{21}$  (switching rate  
198 from state 2 to state 1).

199 With day as the time-unit and a set of parameters of  $\lambda_1 = 1$ ,  $\lambda_2 = 5$ ,  $\mu_{12} = 1/15$ ,  $\mu_{21} = 1$ , this means that:

- 200 • State 1 is a low-detection state with 1 detection per day on average ( $\lambda_1$ ), State 2 is a high-detection state  
201 with 5 detections per day on average ( $\lambda_2$ )
- 202 • When the system is in state 1, there is  $1/15$  switch to state 2 per day on average ( $\mu_{12}$ ), corresponding to 15  
203 days spent on average in state 1 before switching to state 2 ( $1/\mu_{12}$ ). When the system is in state 2, there is  
204 1 switch to state 1 per day on average ( $\mu_{21}$ ), corresponding to 1 days spent on average in state 2 before  
205 switching to state 1 ( $1/\mu_{21}$ )
- 206 • The system is in state 1 for 93.75% of the deployment time on average ( $\pi_1$  in Equation 4), and in state 2  
207 for 6.25% of the time ( $\pi_2$  in Equation 4)
- 208 • In an occupied site, there are on average 1.25 detections per day (Equation 5) and the variance of the  
209 number of daily detections is 4.11 (Equation 6)

210 The proportion of time spent in each state when the system is stationary is the steady-state vector  $\Pi$  of the  
211 Markov chain for a 2-MMPP, is presented in Equation 4 (Fischer & Meier-Hellstern, 1993).

$$\Pi = \begin{pmatrix} \pi_1 & \pi_2 \end{pmatrix} = \begin{pmatrix} \frac{\mu_{21}}{\mu_{12} + \mu_{21}} & \frac{\mu_{12}}{\mu_{12} + \mu_{21}} \end{pmatrix} \quad (4)$$

212 The number of events (here  $N_{it}$  the number of detections at site  $i$  taking place during an observation time  $t$ ) of  
213 a 2-MMPP is described by its expected value  $\mathbb{E}[N_{it}]$  in Equation 5 and by its variance  $\mathbb{V}[N_{it}]$  in Equation 6 (see  
214 Supplementary Informations and Bhat, 1992).

$$\mathbb{E}[N_{it}] = (\lambda_1 \pi_1 + \lambda_2 \pi_2) T \quad (5)$$

$$\mathbb{V}[N_{it}] = \left( \lambda_1 \pi_1 + \lambda_2 \pi_2 + \frac{2(\lambda_1^2 + \lambda_2^2)}{\mu_{12}^2 \mu_{21}^2 \left( \frac{1}{\mu_{12}} + \frac{1}{\mu_{21}} \right)^3} \right) T \quad (6)$$

215 The probability of having at least one detection during an observation period of duration  $T$ , written  $p_T$ , is given  
216 in Equation 7, with  $\exp$  the matrix exponential function (from Guillera-Arroita et al., 2011, section 4.2).

$$p_T = 1 - \Pi \times \exp \left[ \left( \begin{pmatrix} -\mu_{12} & \mu_{12} \\ \mu_{21} & -\mu_{21} \end{pmatrix} - \begin{pmatrix} \lambda_1 & 0 \\ 0 & \lambda_2 \end{pmatrix} \right) \times T \right] \times \begin{pmatrix} 1 \\ 1 \end{pmatrix} \quad (7)$$

217 MMPPs are a type of Cox processes (Cox, 1955). 2-MMPPs can also be referred to as switched Poisson processes  
218 (SPP, Arvidsson and Harris, 1991) or as a doubly stochastic Poisson processes (Bhat, 1992, 1994). For more

219 informations on MMPPs in general (with possibly more than 2 states), see Fischer and Meier-Hellstern (1993),  
 220 Guillerá-Arroita (2012), and Rydén (1994).

221 **Interrupted Poisson Process (IPP)** The IPP occupancy model is a special case of a 2-MMPP where there are  
 222 no detections in one of the state. Since usually,  $\lambda_1 < \lambda_2$  (Skaug, 2006), an IPP is a 2-MMPP where  $\lambda_1 = 0$ .

## 223 2.2 Continuous detection data simulation

224 We simulated detection data in  $I = 100$  sites, with one deployment per site of  $T_i = 100$  time-units. For the sake  
 225 of simplicity, one time-unit corresponds to one day throughout this article. We simulated data with various  
 226 occupancy probability and detection parameters. All simulation parameters are described in Table 2. In  
 227 detection scenarios (a) and (b), we simulated extreme cases of species elusiveness to identify the models'  
 228 limits and behaviour in extreme situations, even if we expect these to produce insufficient data to perform  
 229 occupancy modelling. We carried out  $n_{sim} = 500$  simulations simulation scenario.

Table 2: **Simulation parameters.** With  $p_{100}$  the probability of having at least 1 detection during a deployment of  $T_i = 100$  days at an occupied site (Equation 7);  $p_1$  the probability of having at least 1 detection during 1 day (Equation 7);  $\mathbb{E}[N_{100}]$  the expected number of detections during a deployment of  $T_i = 100$  days at an occupied site (Equation 5);  $\mathbb{V}[N_{100}]$  the variance of the number of detections during a deployment of  $T_i = 100$  days at an occupied site (Equation 6)

| (a) General parameters |                               | (b) Parameters of the 7 detection scenarios |             |            |            |           |       |                       |                       |         |
|------------------------|-------------------------------|---------------------------------------------|-------------|------------|------------|-----------|-------|-----------------------|-----------------------|---------|
|                        |                               | $\lambda_1$                                 | $\lambda_2$ | $\mu_{12}$ | $\mu_{21}$ | $p_{100}$ | $p_1$ | $\mathbb{E}[N_{100}]$ | $\mathbb{V}[N_{100}]$ |         |
| $I$                    | 100 sites                     |                                             |             |            |            |           |       |                       |                       |         |
| $T_i$                  | 100 days                      | (a)                                         | 0.00        | 1.00       | $1/15$     | 30        | 0.19  | 0.002                 | 0.22                  | 0.24    |
| $n_{sim}$              | 500 simulations per scenario  | (b)                                         | 0.00        | 5.00       | $1/15$     | 30        | 0.61  | 0.01                  | 1.11                  | 1.48    |
| $\psi$                 | 0.10, 0.25, 0.50, 0.75, 0.90  | (c)                                         | 0.00        | 1.00       | $1/15$     | 1         | 0.96  | 0.04                  | 6.25                  | 17.24   |
| $T_s$                  | 30 (month), 7 (week), 1 (day) | (d)                                         | 0.25        | 0.25       | $1/15$     | $1/10$    | 1.00  | 0.22                  | 25.00                 | 61.00   |
|                        |                               | (e)                                         | 0.00        | 5.00       | $1/15$     | 1         | 1.00  | 0.09                  | 31.26                 | 306.03  |
|                        |                               | (f)                                         | 0.00        | 1.00       | $1/15$     | $1/10$    | 1.00  | 0.26                  | 40.01                 | 327.98  |
|                        |                               | (g)                                         | 0.00        | 5.00       | $1/15$     | $1/10$    | 1.00  | 0.42                  | 200.06                | 7399.34 |

230 The occupancy status of each site was determined as the outcome of a Bernoulli trial with probability  $\psi$ . The  
 231 detection process was simulated as a 2-MMPP of parameters  $\lambda_1, \lambda_2, \mu_{12}, \mu_{21}$ , using R version 4.2.3 (R Core Team,  
 232 2023). The state at the beginning of a deployment was drawn according to the stationary distribution, as a  
 233 random sampling with probability  $\pi_1$  (*resp.*  $\pi_2$ ) of being in state 1 (*resp.* 2). Until the end of the deployment,  
 234 the time to next event was a draw from an exponential distribution with parameter  $\mu_{12} + \lambda_1$  in state 1, and with  
 235 parameter  $\mu_{21} + \lambda_2$  in state 2. In state 1, this event was either a detection with probability  $\frac{\lambda_1}{\mu_{12} + \lambda_1}$ , or a switch to  
 236 state 2. In state 2, it was either a detection with probability  $\frac{\lambda_2}{\mu_{21} + \lambda_2}$ , or a switch to state 1 (Fig. 2).

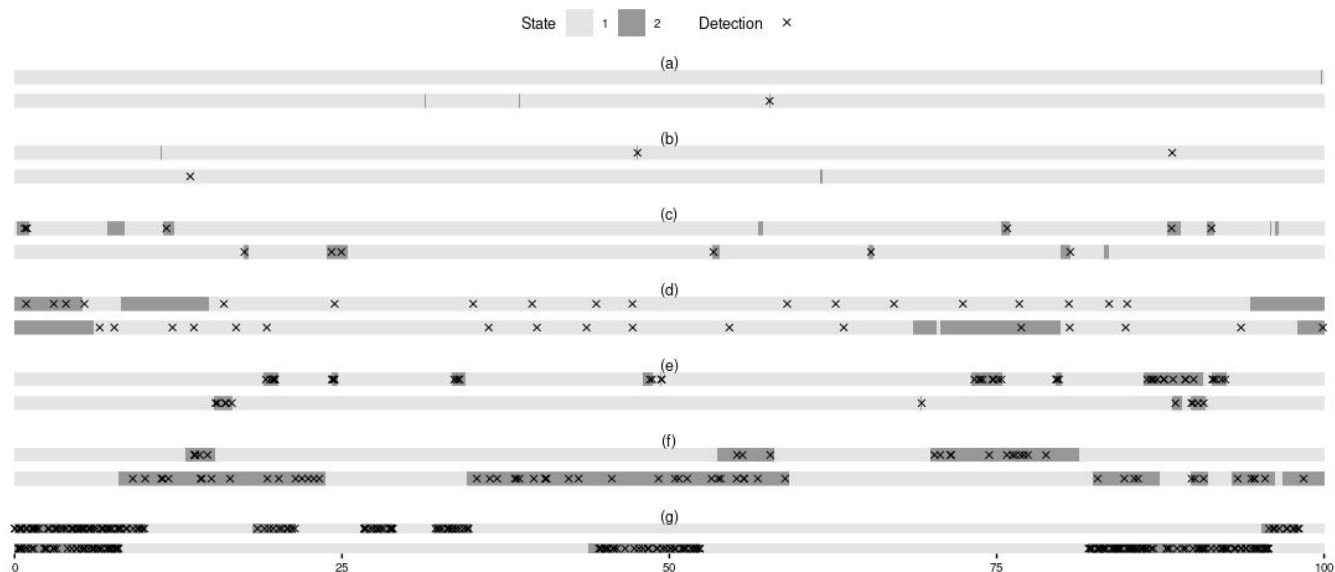

Figure 2: **Simulated detection data.** To help understand the impact of the detection parameters, two examples are given per detection scenario. With scenarios (a to g) described in Table 2. The detection process is simulated in an occupied site during 100 days.

237 **Discretisation into sessions** For the two models that required discretisation into sessions, we used three levels  
238 of discretisation: monthly, weekly, and daily. Incomplete sessions are deemed invalid and will be excluded from  
239 the analysis. Consequently, when the data is discretised into months, there are three sessions consisting of 30  
240 days each, and the detection data of the last 10 days of each deployment is disregarded. Similarly, when the data  
241 is discretised into weeks, there are 14 sessions of 7 days each, the last 2 days of each deployment is discarded.

### 242 **2.3 Frequentist parameter estimation**

243 We estimated models parameters by maximum likelihood estimation and implemented it in R version 4.2.3 (R  
244 Core Team, 2023). For the COP, PP, 2-MMPP and IPP models, we used the `optim` function from the `stats`  
245 package (R Core Team, 2023) to maximise the log-likelihood. For the BP model, we used the function `occu`  
246 from the `unmarked` package version 1.3.2 (Fiske & Chandler, 2011), which calls the same `optim` function. We  
247 used the Nelder-Mead algorithm to maximise the likelihood. To reduce the optimisation time, we used the  
248 simulated parameters as the initial parameters to start the optimisation algorithm. The likelihood  
249 maximisation methodology was equivalent for the 5 models, making their results comparable. In order to  
250 perform unconstrained optimisation, we applied a logit transformation to the probabilities ( $\psi$ ,  $p$ ) and a log  
251 transformation to rates ( $\lambda$ ,  $\lambda_1$ ,  $\lambda_2$ ,  $\mu_{12}$  and  $\mu_{21}$ ). In addition, we fitted the models with the BFGS optimisation  
252 algorithm. The results are not shown here but presented in supplementary information.

### 253 **2.4 Performance comparison for occupancy probability estimation**

254 For each simulation scenario, we calculated the Root Mean Square Error (RMSE, Equation 8) as an error metric,  
255 measuring the absolute difference between the models' point estimates of occupancy probability ( $\hat{\psi}$ ) and the

256 ground-truth occupancy probability ( $\psi$ ), used to simulate data sets of this simulation scenario.

$$\text{RMSE} = \sqrt{\frac{1}{n_{sim}} \sum_{j=1}^{n_{sim}} (\hat{\psi}_j - \psi)^2} = \sqrt{\overline{(\hat{\psi} - \psi)^2}} \quad (8)$$

257 To complete this metric, we calculated absolute bias (AB, Equation 9) to better understand if this error was due  
258 to under-estimation or over-estimation of  $\psi$ .

$$\text{AB} = \frac{1}{n_{sim}} \sum_{j=1}^{n_{sim}} (\hat{\psi}_j - \psi) = \overline{(\hat{\psi} - \psi)} \quad (9)$$

259 To compare the distributions of the point estimates  $\hat{\psi}$  of the five different models and the different  
260 discretisations for BP and COP, we performed a Kruskal-Wallis test for each simulated scenario. We also  
261 conducted Wilcoxon tests with Bonferroni correction and visualised the distribution of  $\hat{\psi}$ .

262 We calculated for each inference the 95% confidence interval (CI) of the occupancy probability. To summarise  
263 this information for all the  $n_{sim}$  simulations by model in each simulation scenario, we used two metrics, the  
264 coverage (Equation 10) and the average range of the confidence interval (ARCI, Equation 11). We note  $CI_l$  and  
265  $CI_u$  the lower and upper bounds of the 95% confidence interval of the estimated occupancy probability.

266 Coverage is the proportion of simulations for which the true simulated occupancy probability ( $\psi$ ) is within the  
267 95% CI of the estimated occupancy probability. In other words, coverage can be interpreted as the percentage  
268 of good predictions of the occupancy probability by a model.

$$\text{Coverage} = \frac{1}{n_{sim}} \sum_{j=1}^{n_{sim}} I(CI_l \leq \psi \leq CI_u) = \overline{I(CI_l \leq \psi \leq CI_u)} \quad (10)$$

269 The average range of the 95% confidence interval measures the precision of the estimation, with the width of  
270 the confidence interval. It completes coverage, since even a model with poor performances can have a coverage  
271 of 100%: If its range is 1, it means that this model predicts that the occupancy probability is between 0 and 1.

$$\text{ARCI} = \frac{1}{n_{sim}} \sum_{j=1}^{n_{sim}} CI_u - CI_l = \overline{CI_u - CI_l} \quad (11)$$

### 272 **3 Results**

273 When a species is easily detectable, all models retrieve well the simulated occupancy probability. With detection  
274 parameters (d), (e), (f) and (g), bias ranges from  $-0.0094$  to  $0.0025$  (Fig. 3) and RMSE are no less than  $0.060$  (Fig.  
275 S2). With those detection parameters, the Kruskal-Wallis tests indicate that there are no statistically significant  
276 difference in the distribution of  $\hat{\psi}$  between models, except with simulation parameters (e) and  $\psi = 0.1$ , (e) and

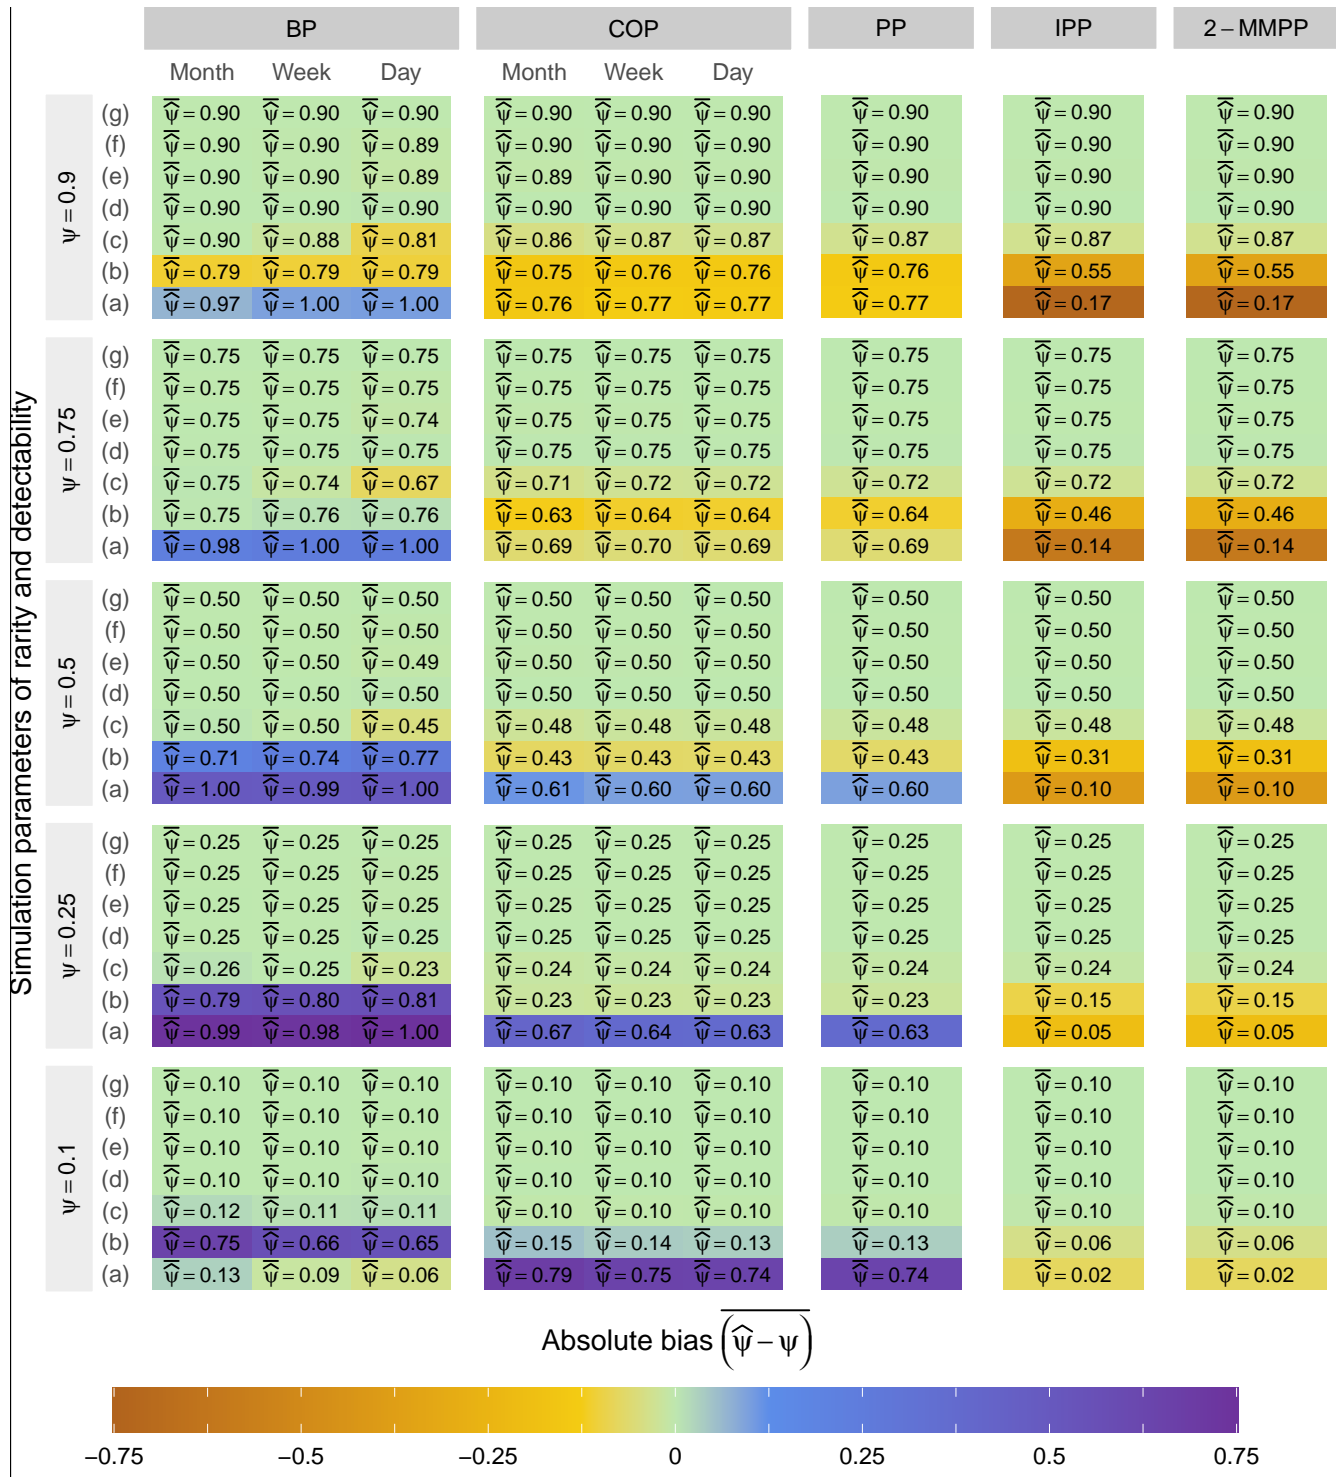

Figure 3: **Absolute bias of the occupancy probability point estimate.** Depending on  $\psi$  the simulated occupancy probability and detection scenarios as described in Table 2. The average value of the occupancy probability point estimate  $\hat{\psi}$  is inside each cell. For two scenarios characterised by low occupancy and detection probabilities, certain repetitions failed to yield any data. With no detection within any of the sites, it was impossible to infer parameters. With detection parameters (a) and  $\psi = 0.25$ , 494 simulations were used to estimate the models' ability to retrieve the simulation parameters. With detection parameters (a) and  $\psi = 0.1$ , only 423 simulations were used.

**Table 3: Kruskal-Wallis test results for simulation scenario of occupancy ( $\psi$ ) and detection (as described in Table 2).** Presented with the Kruskal-Wallis rank sum statistic and the corresponding p-value. We compare nine groups (BP-month, BP-week, BP-day, COP-month, COP-week, COP-day, PP, IPP, and 2-MMPP) based on the distribution of the point estimate of the occupancy probability.

|     | $\psi = 0.1$               | $\psi = 0.25$              | $\psi = 0.5$               | $\psi = 0.75$              | $\psi = 0.9$               |
|-----|----------------------------|----------------------------|----------------------------|----------------------------|----------------------------|
| (g) | 3.08<br>p = 0.929          | 1.68<br>p = 0.989          | 1.62<br>p = 0.990          | 2.90<br>p = 0.940          | 6.84<br>p = 0.554          |
| (f) | 7.06<br>p = 0.530          | 4.53<br>p = 0.806          | 3.38<br>p = 0.908          | 5.37<br>p = 0.717          | 16.30<br>p = 0.038 (*)     |
| (e) | 15.91<br>p = 0.044 (*)     | 5.37<br>p = 0.717          | 2.44<br>p = 0.964          | 5.41<br>p = 0.713          | 17.02<br>p = 0.030 (*)     |
| (d) | 2.12<br>p = 0.977          | 1.40<br>p = 0.994          | 0.90<br>p = 0.999          | 0.23<br>p = 1.000          | 1.31<br>p = 0.995          |
| (c) | 53.88<br>p = 7.3e-09 (***) | 86.21<br>p = 2.7e-15 (***) | 169.74<br>p < 2e-16 (***)  | 342.59<br>p < 2e-16 (***)  | 515.45<br>p < 2e-16 (***)  |
| (b) | 744.68<br>p < 2e-16 (***)  | 1624.07<br>p < 2e-16 (***) | 1280.08<br>p < 2e-16 (***) | 1385.93<br>p < 2e-16 (***) | 1405.16<br>p < 2e-16 (***) |
| (a) | 2729.87<br>p < 2e-16 (***) | 2187.90<br>p < 2e-16 (***) | 2533.64<br>p < 2e-16 (***) | 2516.00<br>p < 2e-16 (***) | 2449.81<br>p < 2e-16 (***) |

277  $\psi = 0.9$  and (f) and  $\psi = 0.9$  (Table 3). The Wilcoxon tests indicate that there is no difference in medians with  
 278 (e) and  $\psi = 0.1$  (Fig. S3). With (e) and  $\psi = 0.9$  and (f) and  $\psi = 0.9$ , only the BP model with daily sessions differs  
 279 from the others, with a slight underestimation of  $\psi$  (Fig. 3).

280 With detection parameters (c), the BP model's ability to retrieve the simulated occupancy probability is slightly  
 281 inferior to other models, with a RMSE ranging from 0.057 to 0.121 while the RMSE of other models are still less  
 282 than 0.060. (Fig. S2). The Wilcoxon tests (Fig. S3) indicate differences between BP and the other models, and  
 283 this difference depends on the discretised session duration. The distribution of  $\hat{\psi}$  with BP is wider than for the  
 284 other models with the same simulated data (Fig. S1).

285 With detection parameters (b), and even more with (a), all five models reach their limits. BP, COP and PP tend  
 286 to overestimate  $\psi$ , whereas IPP and 2-MMPP tend to underestimate  $\psi$  (Fig. 3). BP tend to estimate  $\psi$  at 0 or  
 287 most often at 1 (Fig. S1). COP and PP point estimates of  $\psi$  have similar distributions, both are widely spread  
 288 (Fig. S1). IPP and 2-MMPP tend to underestimate  $\psi$ , with a tighter distribution for its point estimate, which  
 289 often does not include the simulated value of  $\psi$  (Fig. S1).

290 It was not always possible to calculate the confidence interval (CI) of the occupancy probability estimate, when  
 291 the hessian matrix was not invertible. This occurred in two main cases in our study: when there were not many  
 292 sessions with detections in the BP model, or when  $\lambda_1$  was estimated to zero in the 2-MMPP model. As a result,  
 293 the 2-MMPP CIs are not interpretable with detection parameters other than (d), where data were simulated as  
 294 an IPP.

295 With detection parameters (e), (f) and (g), all models have similar coverages (Fig. S4) and occupancy probability  
 296 CI ranges (Fig. S5). As detectability decreases, the CIs widens for BP, COP and PP, although this is more marked



297 and quicker for BP than for COP and PP (Fig. S5). The IPP CIs do not widen, but the coverage drops (Fig. S4).

## 298 **4 Discussion**

299 The focal ecological parameter of interest is the occupancy probability  $\psi$ , which is represented similarly in all  
300 the five models compared. However, the precision of the occupancy estimation is impacted by the quality of the  
301 estimation for the detection process (Kellner & Swihart, 2014; Kéry & Schmidt, 2008). In this study, we focused  
302 on cases in which data is collected continuously, for example with sensors or opportunistic data. We aimed  
303 to evaluate whether modelling the detection process in continuous-time could enhance the precision of the  
304 estimated probability of occupancy.

305 In line with the concept of operating models, commonly used for assessing management strategies  
306 (Butterworth, 1999; Punt et al., 2016), we simulated data under models that aim to closely mimic the ecological  
307 reality expected when observing biodiversity. Specifically, we considered special cases of 2-MMPP, consisting  
308 of four scenarios with detections simulated under an IPP framework (scenarios a, b, c, e, f, g) and one scenario  
309 simulated under a PP framework (scenario d). Subsequently, we aimed to recover the simulation parameters,  
310 focusing on occupancy probability, using these complex models, as well as simpler models well-known and  
311 widely used by ecologists. By simplifying the information and the detection process, we asked the question of  
312 whether these models are sufficient to estimate the ecological parameter of interest in a situation that we  
313 expect to be close to reality.

314 We expected that continuous models would outperform discrete models in accurately retrieving the simulated  
315 occupancy probability, since data simulation aligned with the framework of the continuous models we tested  
316 and discretisation is an aggregation that produces a loss of information. However, in the majority of cases  
317 where detectability was sufficiently high (with a minimum expectation of 25 detections in occupied sites  
318 throughout the entire deployment), all models produced equivalent results, all were able to retrieve the  
319 occupancy probability well, with little bias and error.

320 For models requiring discrete data, we expected that different discretisations would impact the models  
321 outputs (Schofield et al., 2017), but in most simulated scenarios, that was not the case. Our results indicate  
322 that estimation of  $\psi$  with BP is more impacted by the session duration's choice than with COP. Since COP is  
323 mathematically equivalent to PP (Zhang & Bonner, 2019), minor variations in the occupancy estimates  
324 between session lengths for COP are likely due to data discarding. Our comparison framework could be reused  
325 to further test the impact of discretisation, by choosing more diverse session durations that reuse exactly the  
326 same data - rather than dropping data of incomplete sessions as we did.

327 The BP model, as noted by MacKenzie et al. (2002), tends to produce estimates of  $\psi$  close to one for rare and  
328 elusive species. Our findings align with this observation, suggesting however that elusiveness has a more  
329 pronounced impact on this limit than rarity.



330 The COP model was adapted from the model proposed by Emmet et al. (2021). Their model differs from the  
331 one presented here mainly because they considered site use. However, they compared their counting model  
332 with its detection/non-detection equivalent from Bled et al. (2013), much like we compared COP with BP.  
333 Their model estimated occupancy probability with either equivalent or smaller bias compared to the  
334 equivalent detection/non-detection model, which aligns with our results.

335 In a simulation study, Guillera-Aroita et al. (2011) evaluated BP and PP using data generated within a PP  
336 framework. They reported that both models provided reasonably unbiased estimates of occupancy, except for  
337 rare and elusive species. In these cases, BP exhibited greater bias and variance, particularly with larger  
338 discretisation intervals and fewer sessions, which matches our results. They also compared PP and 2-MMPP  
339 using clustered detection data generated within an IPP framework. They noted negative bias in the occupancy  
340 estimates with the PP model, which was not observed in our results. In our study, both models performed  
341 similarly for easily detectable species. However, for elusive species, the 2-MMPP and IPP models exhibited  
342 more pronounced negative bias than the PP and COP models.

343 To better define the limitations of these models, we could perform additional comparisons using simulation  
344 scenarios with various detection parameters. Given the impossibility of exhaustively covering all potential  
345 scenarios, we encourage modelers encountering borderline cases to conduct their own comparisons based on  
346 their specific study goals to choose the best model for them. Our code is available to use as a base for  
347 additional comparisons.

## 348 **4.1 Choosing the appropriate model**

### 349 **4.1.1 Occupancy modelling for easily detectable species**

350 When the species is easily detectable and thus enough observation data have been obtained, all models  
351 accurately estimate the occupation probability. Under these conditions, if the sole aim of a study is to  
352 accurately estimate occupancy, selecting any of these models essentially amounts to choosing the right one.  
353 Therefore, the choice can be guided by other considerations, to find the right balance between performance  
354 and execution costs.

355 **Learning and implementation costs** Continuous-time models may be unfamiliar to ecologists, potentially  
356 requiring a steep learning curve to become proficient with these seemingly complex models. For models that  
357 are not readily available, the implementation costs can be substantial for a study. As time-to-detection  
358 occupancy models become accessible to ecologists, such as through R packages like *unmarked* (Kellner et al.,  
359 2023), the costs shifts from fully implementing a model to using existing functions, which is much faster.

360 **Study objectives** If the primary goal is to estimate the occupancy of the target species, any of the models can  
361 be employed effectively. Simple models, such as BP, COP or PP, require the estimation of only two parameters:  
362 one for occupancy and one for detection. Choosing such a model can enhance interpretability and provide a

363 greater statistical power than models with more parameters. This is especially advantageous when  
364 incorporating several spatial and temporal covariates into the analysis. Conversely, if the aim is to conduct a  
365 detailed analysis of the target species detection timeline, for instance, to gain insights into its temporal activity  
366 patterns, then a model that accommodates the detection process in multiple states (e.g., 2 states for a 2-MMPP,  
367 potentially more) can be more advantageous. For these models, we could reconstruct the hidden state to  
368 better understand the detection variability.

369 **Temporal auto-correlation** Unlike sampling occasions, consecutive discretised sessions are not temporally  
370 independent (Bailey et al., 2014), and there may be significant temporal auto-correlation (Neilson et al., 2018).  
371 Therefore, discretised session data does not meet the discrete-time model assumption of independence.  
372 However, the PP model has the exact same drawback when considering a constant detection rate, since the  
373 numbers of events on two disjoint time intervals are independent. In this study, we did not thoroughly  
374 examine the influence of time dependence on occupancy estimates, although two-state models do introduce  
375 some time dependence due to differing detection rates conditional on state. It would be interesting to explore,  
376 especially since clustered observation data prompted the use of two-state models by Guillera-Aroita et al.  
377 (2011).

378 **Calculation time** All models were fairly fast to fit, so calculation time should probably not be the main reason  
379 for choosing a model for most studies. We have not robustly evaluated the optimisation time for each model, as  
380 we used different computers with varying characteristics. However, the two-state models seemed significantly  
381 longer to fit than the other models. BP, COP and PP all took less than 6 seconds to fit, even in the simulation  
382 scenario with most detections, in which there was 200 detections on average in occupied sites. IPP and 2-MMPP  
383 often took more than a minute, up to 28 minutes.

384 **Detection rate** A detection probability per discretised session, as in the BP model, is relevant only at the  
385 discretisation scale. This is not the case with a detection rate, as used in the discrete-time COP model or in  
386 continuous-time models. We argue that using a detection rate instead of a detection probability would  
387 enhance the comparability among studies. Moreover, it could simplify the process of experimental design,  
388 especially concerning observation duration, by using the insights from existing literature on the target species.

#### 389 **4.1.2 Occupancy modelling for highly elusive species**

390 When the species is highly elusive, the five models we considered provided inaccurate estimates of its presence  
391 probability, exhibiting high bias, error, and a low precision or coverage. The BP model's limits became apparent  
392 at lower species elusiveness compared to the other models. This could be because valuable information gets lost  
393 when simplifying the data into detection and no detection. The 2-MMPP and IPP models showed larger errors  
394 in estimating  $\psi$  compared to the COP and PP models. This might be due to the higher number of parameters  
395 in the 2-MMPP and IPP models (5 and 4, respectively, versus 2 for COP and PP), which would require more

396 data to fit them correctly. COP and PP models appear to strike a good balance between simplification and  
397 realism. One is discrete, while the other is continuous, but both perform similarly, which is consistent with the  
398 demonstration of Zhang and Bonner (2019) that a Poisson process in continuous time is equivalent to a classical  
399 model with discretisation where the detection process is not a Bernoulli trial but a Poisson distribution draw.

400 However, if the species' high elusiveness resulted in the collection of insufficient observation data, the best  
401 course of action probably is to collect more data by extending the monitoring period (Kays et al., 2020). In  
402 cases where it is expected that the species will be challenging to detect, conducting simulations and  
403 comparing different models with expected detection and occupancy parameters could assist in fine-tuning  
404 the study design and model choice.

405 If obtaining more data is not feasible, it might be best to refrain from running an occupancy model, or at least  
406 approach the results with caution, regardless of the chosen model. In this case, we recommend fitting different  
407 models, particularly when using the two-state models. For these models, our findings indicate that with highly  
408 elusive species, the confidence interval of the estimated  $\psi$  can be narrow but substantially different from the  
409 actual  $\psi$ . This can potentially lead to a misleading perception of model reliability.

## 410 **4.2 Implications for continuous monitoring frameworks**

411 The advanced processors available today offer great computing power, enabling the fast development of  
412 artificial intelligence. Recognising species automatically is becoming more common, on camera-trap images  
413 (Le Borgne & Bouget, 2023), ARUs recordings (Potamitis et al., 2014), or even with sensors networks (Wägele  
414 et al., 2022). Artificial intelligence combined with sensors offers the potential to fully automate the analysis  
415 workflow (Gimenez et al., 2022; Lahoz-Monfort & Magrath, 2021). Overall, sensors and AI have led to a  
416 paradigm shift in the conditions and capabilities of biodiversity monitoring (Besson et al., 2022; Tuia et al.,  
417 2022; Zwerts et al., 2021). With our comparison, we found that continuous occupancy modelling is not  
418 necessary to estimate occupancy accurately. Therefore, in operational conditions, the necessary trade-off  
419 between accuracy and ease of implementation may turn in favour of discrete-time models, with easily  
420 available data for temporal covariates. This advantage for operational studies could also be beneficial to  
421 large-scale biodiversity conservation using sensor-based monitoring and occupancy modelling (Oliver et al.,  
422 2023).

423 Our results do not only concern sensor data, but all continuously collected data. Opportunistic data, collected  
424 at non-defined and irregular intervals, pose some of the same challenges as sensor data (Altwegg & Nichols,  
425 2019; Hsing, 2019). Some studies use classical discrete-time models that discretise data into long sessions (e.g.,  
426 by year, as in van Strien et al., 2013). Continuous-time capture-recapture models have been used for their  
427 potential to analyse opportunistic data (Choquet et al., 2017). The insights gained from this comparison study  
428 suggest that even discrete occupancy models could be used with a wide range of unmarked opportunistic data.  
429 They could produce accurate occupancy estimates, if other challenges of opportunistic data such as highly  
430 variable observation effort are managed.

## 431 **Acknowledgements**

432 LP benefits from a French government CIFRE grant for PhD students. This work is part of the PSI-BIOM project  
433 granted by the French PIA 3 under grant number 2182D0406-A.

## 434 **Conflict of Interest statement**

435 The authors declare no conflict of interest.

## 436 **Author Contributions**

- 437 • LP: Formal analysis, Investigation, Methodology, Visualisation, Writing – original draft.
- 438 • SM, OG, MPE: Validation, Writing – review and editing.
- 439 • All authors: Conceptualisation.

## 440 **Code availability**

441 Code is available at:

442 <https://oikolab.terroiko.fr:10001/publications/occupancy-modelling-comparison-discrete-continuous>

## 443 **References**

- 444 Altwegg, R., & Nichols, J. D. (2019). Occupancy models for citizen-science data. *Methods in Ecology and*  
445 *Evolution*, 10(1), 8–21. <https://doi.org/10.1111/2041-210X.13090>
- 446 Arvidsson, A., & Harris, R. (1991). Performance comparison of models of individual and merged bursty traffics.  
447 *Sixth Australian Teletraffic Research Seminar*.
- 448 Bailey, L. L., MacKenzie, D. I., & Nichols, J. D. (2014). Advances and applications of occupancy models (E. Cooch,  
449 Ed.). *Methods in Ecology and Evolution*, 5(12), 1269–1279. <https://doi.org/10.1111/2041-210X.12100>
- 450 Becker, N. G. (1984). Estimating Population Size from Capture-Recapture Experiments in Continuous Time.  
451 *Australian Journal of Statistics*, 26(1), 1–7. <https://doi.org/10.1111/j.1467-842X.1984.tb01261.x>
- 452 Besson, M., Alison, J., Bjerge, K., Gorochofski, T. E., Høye, T. T., Jucker, T., Mann, H. M. R., & Clements, C. F.  
453 (2022). Towards the fully automated monitoring of ecological communities. *Ecology Letters*, 25(12),  
454 2753–2775. <https://doi.org/10.1111/ele.14123>
- 455 Bhat, V. N. (1992). Switched poisson process/g/1 queue with service interruptions. *Computers & Operations*  
456 *Research*, 19(8), 751–756. [https://doi.org/10.1016/0305-0548\(92\)90014-V](https://doi.org/10.1016/0305-0548(92)90014-V)
- 457 Bhat, V. N. (1994). Renewal Approximations of the Switched Poisson Processes and Their Applications to  
458 Queueing Systems. *Journal of the Operational Research Society*, 45(3), 345–353.  
459 <https://doi.org/10.1057/jors.1994.47>
- 460 Bled, F., Nichols, J. D., & Altwegg, R. (2013). Dynamic occupancy models for analyzing species' range dynamics  
461 across large geographic scales. *Ecology and Evolution*, 3(15), 4896–4909. <https://doi.org/10.1002/ece3.858>
- 462 858
- 463 Burton, A. C., Neilson, E., Moreira, D., Ladle, A., Steenweg, R., Fisher, J. T., Bayne, E., & Boutin, S. (2015). REVIEW:  
464 Wildlife camera trapping: A review and recommendations for linking surveys to ecological processes.  
465 *Journal of Applied Ecology*, 52(3), 675–685. <https://doi.org/10.1111/1365-2664.12432>
- 466 Butterworth, D. (1999). Experiences in the evaluation and implementation of management procedures. *ICES*  
467 *Journal of Marine Science*, 56(6), 985–998. <https://doi.org/10.1006/jmsc.1999.0532>
- 468 Choquet, R., Garnier, A., Awuve, E., & Besnard, A. (2017). Transient state estimation using continuous-time  
469 processes applied to opportunistic capture–recapture data. *Ecological Modelling*, 361, 157–163.  
470 <https://doi.org/10.1016/j.ecolmodel.2017.08.001>
- 471 Cove, M. V., Kays, R., Bontrager, H., Bresnan, C., Lasky, M., Frerichs, T., Klann, R., Lee Jr., T. E., Crockett, S. C.,  
472 Crupi, A. P., Weiss, K. C. B., Rowe, H., Sprague, T., Schipper, J., Tellez, C., Lepczyk, C. A., Fantle-Lepczyk,  
473 J. E., LaPoint, S., Williamson, J., ... McShea, W. J. (2021). SNAPSHOT USA 2019: A coordinated national  
474 camera trap survey of the United States. *Ecology*, 102(6), e03353. <https://doi.org/10.1002/ecy.3353>
- 475 Cox, D. R. (1955). Some Statistical Methods Connected with Series of Events. *Journal of the Royal Statistical*  
476 *Society: Series B (Methodological)*, 17(2), 129–157. <https://doi.org/10.1111/j.2517-6161.1955.tb00188.x>
- 477 Cusack, J. J., Dickman, A. J., Rowcliffe, J. M., Carbone, C., Macdonald, D. W., & Coulson, T. (2015). Random versus  
478 Game Trail-Based Camera Trap Placement Strategy for Monitoring Terrestrial Mammal Communities  
479 (R. Guralnick, Ed.). *PLOS ONE*, 10(5), e0126373. <https://doi.org/10.1371/journal.pone.0126373>

- 480 Emmet, R. L., Long, R. A., & Gardner, B. (2021). Modeling multi-scale occupancy for monitoring rare and highly  
481 mobile species. *Ecosphere*, 12(7), e03637. <https://doi.org/10.1002/ecs2.3637>
- 482 Fischer, W., & Meier-Hellstern, K. (1993). The Markov-modulated Poisson process (MMPP) cookbook.  
483 *Performance Evaluation*, 18(2), 149–171. [https://doi.org/10.1016/0166-5316\(93\)90035-S](https://doi.org/10.1016/0166-5316(93)90035-S)
- 484 Fiske, I., & Chandler, R. (2011). {Unmarked}: An {R} Package for Fitting Hierarchical Models of Wildlife  
485 Occurrence and Abundance. *Journal of Statistical Software*, 43, 1–23.  
486 <https://doi.org/10.18637/jss.v043.i10>
- 487 Gilbert, N. A., Clare, J. D. J., Stenglein, J. L., & Zuckerberg, B. (2021). Abundance estimation of unmarked animals  
488 based on camera-trap data. *Conservation Biology: The Journal of the Society for Conservation Biology*,  
489 35(1), 88–100. <https://doi.org/10.1111/cobi.13517>
- 490 Gimenez, O., Kervellec, M., Fanjul, J.-B., Chaine, A., Maescot, L., Bollet, Y., & Duchamp, C. (2022). Trade-off  
491 between deep learning for species identification and inference about predator-prey co-occurrence.  
492 *Computo*. <https://doi.org/10.57750/yfm2-5f45>
- 493 Gonzalez, A., Vihervaara, P., Balvanera, P., Bates, A. E., Bayraktarov, E., Bellingham, P. J., Bruder, A., Campbell, J.,  
494 Catchen, M. D., Cavender-Bares, J., Chase, J., Coops, N., Costello, M. J., Dornelas, M., Dubois, G., Duffy,  
495 E. J., Eggermont, H., Fernandez, N., Ferrier, S., ... Wright, E. (2023). A global biodiversity observing  
496 system to unite monitoring and guide action. *Nature Ecology & Evolution*, 1–5. <https://doi.org/10.1038/s41559-023-02171-0>
- 497
- 498 Guillera-Aroita, G. (2012). *Occupancy modelling : Study design and models for data collected along transects*  
499 (Doctoral dissertation). University of Kent. <https://doi.org/10.22024/UniKent/01.02.86472>
- 500 Guillera-Aroita, G. (2016). Modelling of species distributions, range dynamics and communities under  
501 imperfect detection: Advances, challenges and opportunities. *Ecography*, 40(2), 281–295.  
502 <https://doi.org/10.1111/ecog.02445>
- 503 Guillera-Aroita, G., Morgan, B. J. T., Ridout, M. S., & Linkie, M. (2011). Species Occupancy Modeling for  
504 Detection Data Collected Along a Transect. *Journal of Agricultural, Biological, and Environmental*  
505 *Statistics*, 16(3), 301–317. <https://doi.org/10.1007/s13253-010-0053-3>
- 506 Høye, T. T., Groom, Q., Juslén, A., Mandon, C., Dinesen, L., Rosenberg, A., Hendriks, R. J., Eggermont, H., &  
507 Vihervaara, P. (2022). *Biodiversity monitoring knowledge gaps and research & innovation priorities* (tech.  
508 rep. Biodiversa+ D2.1).
- 509 Hsing, P.-Y. (2019). *Monitoring the UK's wild mammals: A new grammar for citizen science engagement and*  
510 *ecology* (Doctoral dissertation). Durham University.
- 511 IPBES. (2019). *Global assessment report on biodiversity and ecosystem services of the Intergovernmental Science-*  
512 *Policy Platform on Biodiversity and Ecosystem Services* (tech. rep.). Zenodo. <https://doi.org/10.5281/zenodo.6417333>
- 513
- 514 IUCN. (2021). *Nature 2030 : One nature, one future : A programme for the Union 2021-2024* (tech. rep.). IUCN.
- 515 Kays, R., Arbogast, B. S., Baker-Whitton, M., Beirne, C., Boone, H. M., Bowler, M., Burneo, S. F., Cove, M. V., Ding,  
516 P., Espinosa, S., Gonçalves, A. L. S., Hansen, C. P., Jansen, P. A., Kolowski, J. M., Knowles, T. W., Lima,



- 517 M. G. M., Millsbaugh, J., McShea, W. J., Pacifici, K., . . . Spironello, W. R. (2020). An empirical evaluation  
518 of camera trap study design: How many, how long and when? *Methods in Ecology and Evolution*, 11(6),  
519 700–713. <https://doi.org/10.1111/2041-210X.13370>
- 520 Kellner, K. F., Parsons, A. W., Kays, R., Millsbaugh, J. J., & Rota, C. T. (2022). A Two-Species Occupancy Model  
521 with a Continuous-Time Detection Process Reveals Spatial and Temporal Interactions. *Journal of*  
522 *Agricultural, Biological and Environmental Statistics*, 27(2), 321–338.  
523 <https://doi.org/10.1007/s13253-021-00482-y>
- 524 Kellner, K. F., Smith, A. D., Royle, J. A., Kéry, M., Belant, J. L., & Chandler, R. B. (2023). The unmarked R package:  
525 Twelve years of advances in occurrence and abundance modelling in ecology. *Methods in Ecology and*  
526 *Evolution*, n/a(n/a). <https://doi.org/10.1111/2041-210X.14123>
- 527 Kellner, K. F., & Swihart, R. K. (2014). Accounting for Imperfect Detection in Ecology: A Quantitative Review.  
528 *PLOS ONE*, 9(10), e111436. <https://doi.org/10.1371/journal.pone.0111436>
- 529 Kéry, M., & Schmidt, B. (2008). Imperfect detection and its consequences for monitoring for conservation.  
530 *Community Ecology*, 9(2), 207–216. <https://doi.org/10.1556/comec.9.2008.2.10>
- 531 Lahoz-Monfort, J. J., & Magrath, M. J. L. (2021). A Comprehensive Overview of Technologies for Species and  
532 Habitat Monitoring and Conservation. *BioScience*, 71(10), 1038–1062. [https://doi.org/10.1093/biosci/](https://doi.org/10.1093/biosci/biab073)  
533 [biab073](https://doi.org/10.1093/biosci/biab073)
- 534 Le Borgne, H., & Bouget, C. (2023). Suivis de biodiversité par la reconnaissance automatique des espèces sur  
535 photographies : Perspectives et défis. *Naturae*, (6). <https://doi.org/10.5852/naturae2023a6>
- 536 MacKenzie, D. I., Nichols, J. D., Lachman, G. B., Droege, S., Andrew Royle, J., & Langtimm, C. A. (2002).  
537 Estimating Site Occupancy Rates When Detection Probabilities Are Less Than One. *Ecology*, 83(8),  
538 2248–2255. <https://doi.org/10.2307/3072056>
- 539 MacKenzie, D. I., Royle, J. A., Brown, J. A., & Nichols, J. D. (2013). Occupancy Estimation and Modeling for Rare  
540 and Elusive Populations. *Sampling Rare or Elusive Species: Concepts, Designs, and Techniques for*  
541 *Estimating Population Parameters*. Island Press.
- 542 Moore, H. A., Champney, J. L., Dunlop, J. A., Valentine, L. E., Nimmo, D. G., Moore, H. A., Champney, J. L.,  
543 Dunlop, J. A., Valentine, L. E., & Nimmo, D. G. (2020). Spot on: Using camera traps to individually  
544 monitor one of the world's largest lizards. *Wildlife Research*, 47(4), 326–337.  
545 <https://doi.org/10.1071/WR19159>
- 546 Neilson, E. W., Avgar, T., Burton, A. C., Broadley, K., & Boutin, S. (2018). Animal movement affects interpretation  
547 of occupancy models from camera-trap surveys of unmarked animals. *Ecosphere*, 9(1), e02092. <https://doi.org/10.1002/ecs2.2092>
- 548 [//doi.org/10.1002/ecs2.2092](https://doi.org/10.1002/ecs2.2092)
- 549 Oliver, R. Y., Iannarilli, E., Ahumada, J., Fegraus, E., Flores, N., Kays, R., Birch, T., Ranipeta, A., Rogan, M. S.,  
550 Sica, Y. V., & Jetz, W. (2023). Camera trapping expands the view into global biodiversity and its change.  
551 *Philosophical Transactions of the Royal Society B: Biological Sciences*, 378(1881), 20220232. [https://doi.](https://doi.org/10.1098/rstb.2022.0232)  
552 [org/10.1098/rstb.2022.0232](https://doi.org/10.1098/rstb.2022.0232)

- 553 Pollock, L. J., Tingley, R., Morris, W. K., Golding, N., O'Hara, R. B., Parris, K. M., Vesk, P. A., & McCarthy, M. A.  
554 (2014). Understanding co-occurrence by modelling species simultaneously with a Joint Species  
555 Distribution Model (JSDM). *Methods in Ecology and Evolution*, 5(5), 397–406.  
556 <https://doi.org/10.1111/2041-210X.12180>
- 557 Potamitis, I., Ntalampiras, S., Jahn, O., & Riede, K. (2014). Automatic bird sound detection in long real-field  
558 recordings: Applications and tools. *Applied Acoustics*, 80, 1–9. [https://doi.org/10.1016/j.apacoust.2014.](https://doi.org/10.1016/j.apacoust.2014.01.001)  
559 [01.001](https://doi.org/10.1016/j.apacoust.2014.01.001)
- 560 Punt, A. E., Butterworth, D. S., De Moor, C. L., De Oliveira, J. A. A., & Haddon, M. (2016). Management strategy  
561 evaluation: Best practices. *Fish and Fisheries*, 17(2), 303–334. <https://doi.org/10.1111/faf.12104>
- 562 R Core Team. (2023). *R: A language and environment for statistical computing*. Manual. R Foundation for  
563 Statistical Computing. Vienna, Austria.
- 564 Rodríguez, J. P., Keith, D. A., Rodríguez-Clark, K. M., Murray, N. J., Nicholson, E., Regan, T. J., Miller, R. M.,  
565 Barrow, E. G., Bland, L. M., Boe, K., Brooks, T. M., Oliveira-Miranda, M. A., Spalding, M., & Wit, P.  
566 (2015). A practical guide to the application of the IUCN Red List of Ecosystems criteria. *Philosophical*  
567 *Transactions of the Royal Society B: Biological Sciences*, 370(1662), 20140003.  
568 <https://doi.org/10.1098/rstb.2014.0003>
- 569 Rushing, C. S. (2023). An ecologist's introduction to continuous-time multi-state models for capture-recapture  
570 data. *Journal of Animal Ecology*, n/a(n/a). <https://doi.org/10.1111/1365-2656.13902>
- 571 Rydén, T. (1994). Parameter estimation for Markov modulated poisson processes. *Communications in Statistics.*  
572 *Stochastic Models*, 10(4), 795–829. <https://doi.org/10.1080/15326349408807323>
- 573 Schofield, M. R., Barker, R. J., & Gelling, N. (2017). Continuous-time capture–recapture in closed populations.  
574 *Biometrics*, 74(2), 626–635. <https://doi.org/10.1111/biom.12763>
- 575 Skaug, H. J. (2006). Markov Modulated Poisson Processes for Clustered Line Transect Data. *Environmental and*  
576 *Ecological Statistics*, 13(2), 199–211. <https://doi.org/10.1007/s10651-005-0006-0>
- 577 Steenweg, R., Hebblewhite, M., Kays, R., Ahumada, J., Fisher, J. T., Burton, C., Townsend, S. E., Carbone, C.,  
578 Rowcliffe, J. M., Whittington, J., Brodie, J., Royle, J. A., Switalski, A., Clevenger, A. P., Heim, N., & Rich,  
579 L. N. (2017). Scaling-up camera traps: Monitoring the planet's biodiversity with networks of remote  
580 sensors. *Frontiers in Ecology and the Environment*, 15(1), 26–34. <https://doi.org/10.1002/fee.1448>
- 581 Tuia, D., Kellenberger, B., Beery, S., Costelloe, B. R., Zuffi, S., Risse, B., Mathis, A., Mathis, M. W., van  
582 Langevelde, F., Burghardt, T., Kays, R., Klinck, H., Wikelski, M., Couzin, I. D., van Horn, G.,  
583 Crofoot, M. C., Stewart, C. V., & Berger-Wolf, T. (2022). Perspectives in machine learning for wildlife  
584 conservation. *Nature Communications*, 13(1), 792. <https://doi.org/10.1038/s41467-022-27980-y>
- 585 UNECE. (2023). *Guidelines for Developing National Biodiversity Monitoring Systems*. United Nations. [https://](https://doi.org/10.18356/9789210024006)  
586 [doi.org/10.18356/9789210024006](https://doi.org/10.18356/9789210024006)
- 587 van Strien, A. J., van Swaay, C. A., & Termaat, T. (2013). Opportunistic citizen science data of animal species  
588 produce reliable estimates of distribution trends if analysed with occupancy models. *Journal of Applied*  
589 *Ecology*, 50(6), 1450–1458. <https://doi.org/10.1111/1365-2664.12158>



- 590 Vihervaara, P., Lipsanen, A., Suni, T., Mandon, C., Eggermont, H., Body, G., Basille, M., Naeslund, M.,  
591 Silva Del Pozo, M., Basset, A., Onen Tarantini, S., Dinesen, L., Hoye, T., Hendriks, R., Heck, A.,  
592 Eichenberg, D., McCallum, I., Liqueste, C., Maes, J., ... Borg, J. (2023). *Biodiversa+ strategic biodiversity*  
593 *monitoring governance document (Phase 1)* (tech. rep. Biodiversa+ D2.8).
- 594 Wägele, J. W., Bodesheim, P., Bourlat, S. J., Denzler, J., Diepenbroek, M., Fonseca, V., Frommolt, K.-H.,  
595 Geiger, M. F., Gemeinholzer, B., Glöckner, F. O., Haucke, T., Kirse, A., Kölpin, A., Kostadinov, I.,  
596 Köhl, H. S., Kurth, F., Lasseck, M., Liedke, S., Losch, F., ... Wildermann, S. (2022). Towards a  
597 multisensor station for automated biodiversity monitoring. *Basic and Applied Ecology*, 59, 105–138.  
598 <https://doi.org/10.1016/j.baae.2022.01.003>
- 599 Zhang, W., & Bonner, S. J. (2019). On continuous-time capture-recapture in closed populations. *Biometrics*,  
600 76(3), 1028–1033. <https://doi.org/10.1111/biom.13185>
- 601 Zwerts, J. A., Stephenson, P. J., Maisels, E., Rowcliffe, M., Astaras, C., Jansen, P. A., van der Waarde, J.,  
602 Sterck, L. E. H. M., Verweij, P. A., Bruce, T., Brittain, S., & van Kuijk, M. (2021). Methods for wildlife  
603 monitoring in tropical forests: Comparing human observations, camera traps, and passive acoustic  
604 sensors. *Conservation Science and Practice*, 3(12), e568. <https://doi.org/10.1111/csp2.568>
